# Supplementary material for: Long-read single-cell RNA sequencing enables the study of cancer subclone-specific genotypes and phenotypes in chronic lymphocytic leukemia
Source: HighWire-hosted journal article supplement (doi:10.1101/gr.279049.124), 2025-02-18
Supplement: Supplemental_Table_S1.xlsx [file Supplemental_Table_S1.xlsx]

## Sheet: Sheet1
Supplemental Table S1. Clinical data for each patient included in the study.
patient	age	gender	treatment	treatment_duration	IGHV	FISH del13q	FISH +12	FISH del11q	FISH del17p	complex karyotype
1	75	M	ibrutinib	2 year	unknown	x				no
2	57	M	ibrutinib	3.5 years	U			x		no
3	55	F	acalabrutinib	3.5 years	unknown	x		x		yes
4	56	F	ibrutinib	3.5 years	U		x			no
5	59	F	acalabrutinib	2.5 years	U			x		no
6	56	M	acalabrutinib	3.5 years	U	x			x	yes
