# Supplementary material for: Long-read single-cell RNA sequencing enables the study of cancer subclone-specific genotypes and phenotypes in chronic lymphocytic leukemia
Source: HighWire-hosted journal article supplement (doi:10.1101/gr.279049.124), 2025-02-18
Supplement: Supplemental_Table_S2.xlsx [file Supplemental_Table_S2.xlsx]

## Sheet: Genes - Patient 1 Relapse
Supplemental Table S2. Full differential gene expression results when comparing the BTK-mutated subclone to the original clone.
gene	p_val	avg_log2FC	pct.1	pct.2	p_val_adj
TXNIP	1.85551e-244	1.33028	0.978	0.813	2.95491e-240
IGLL5	8.81116e-230	-1.33815	0.28	0.882	1.40318e-225
ADTRP	7.46688e-182	0.856525	0.628	0.185	1.1891e-177
LYST	2.39605e-164	0.515449	0.369	0.049	3.81571e-160
LTB	8.12377e-158	1.1288	0.675	0.261	1.29371e-153
IFI27	1.42361e-156	0.832974	0.214	0.005	2.2671e-152
VPREB3	2.08757e-115	0.768209	0.457	0.137	3.32445e-111
CCDC88A	1.30457e-102	-0.86016	0.29	0.66	2.07752e-98
LINC00926	1.72095e-101	0.63595	0.596	0.256	2.74062e-97
BTG2	2.03992e-98	0.781226	0.931	0.773	3.24857e-94
H3-3A	2.63198e-96	0.57859	0.964	0.895	4.19143e-92
GAS5	5.38929e-95	-0.677145	0.663	0.89	8.58244e-91
CD79A	3.33073e-89	0.666498	0.897	0.667	5.30418e-85
HRK	2.3208e-87	0.399403	0.277	0.058	3.69588e-83
TRDC	4.72838e-87	-0.730082	0.007	0.331	7.52995e-83
JUNB	5.95816e-86	0.74169	0.697	0.395	9.48836e-82
ENSG00000268093+RPL18	5.67383e-82	-0.408833	1	1	9.03557e-78
UQCRH	3.10391e-79	-0.602539	0.666	0.871	4.94298e-75
HLA-DMA	4.84349e-77	-0.631024	0.783	0.92	7.71326e-73
PTMS	5.71915e-77	-0.532403	0.031	0.337	9.10774e-73
ATP6V1G1	4.85953e-76	0.570452	0.874	0.699	7.73881e-72
DEPP1	2.66452e-70	0.281293	0.122	0.008	4.24326e-66
FAM126A	1.07749e-69	-0.528554	0.051	0.344	1.71591e-65
CD37	1.91145e-69	0.53205	0.988	0.961	3.04398e-65
RACK1	3.19564e-68	-0.442382	0.997	0.999	5.08906e-64
IGLC2+IGLL5	3.5592e-67	-0.673486	0.19	0.507	5.66803e-63
IGHG4	1.37546e-66	-0.551294	0.235	0.574	2.19042e-62
EVA1B	1.41816e-64	0.354703	0.29	0.086	2.25841e-60
LAPTM5	1.87521e-59	-0.474983	0.865	0.951	2.98628e-55
TXNDC5	5.05025e-58	0.40159	0.388	0.159	8.04253e-54
ITGB1	4.46682e-57	0.407094	0.437	0.196	7.11341e-53
PKIG	1.49282e-55	-0.438726	0.056	0.304	2.37731e-51
CD99	3.98868e-54	-0.492186	0.142	0.409	6.35197e-50
LHPP	1.08926e-52	0.5004	0.485	0.249	1.73464e-48
SNHG29	1.75565e-52	-0.491793	0.642	0.832	2.79587e-48
C16orf74	1.41819e-51	0.328198	0.293	0.103	2.25847e-47
GSTP1	1.78172e-51	0.587274	0.684	0.483	2.83739e-47
CYBA	7.98856e-51	0.440445	0.94	0.916	1.27218e-46
NACA	7.17223e-50	-0.356794	0.991	1	1.14218e-45
CDKN2A	1.64892e-48	-0.335467	0.03	0.247	2.62591e-44
DBI	1.53793e-44	-0.625305	0.676	0.84	2.44915e-40
LINC01480	3.27675e-43	-0.500684	0.111	0.335	5.21823e-39
MIR155HG	4.97503e-43	-0.46735	0.201	0.445	7.92274e-39
CALHM6	2.38008e-42	0.393413	0.493	0.274	3.79027e-38
ENSG00000226571	1.69171e-41	-0.348238	0.077	0.287	2.69405e-37
GADD45B	2.1268e-41	0.341797	0.348	0.157	3.38693e-37
RHOH	2.22665e-41	0.402677	0.525	0.304	3.54594e-37
ENSG00000244398	3.4771e-41	-0.382115	0.831	0.937	5.53729e-37
CD24	1.02783e-40	0.455399	0.95	0.903	1.63683e-36
ENSG00000196656	7.94252e-40	-0.282366	0.999	0.999	1.26485e-35
MEF2C	2.38286e-39	-0.438931	0.298	0.522	3.7947e-35
DUSP1	7.86632e-38	0.391525	0.447	0.248	1.25271e-33
MZB1	1.53887e-37	0.393932	0.564	0.354	2.45065e-33
HLA-DQA1	1.92768e-37	-0.604329	0.684	0.821	3.06983e-33
RRBP1	2.99384e-37	0.307051	0.304	0.134	4.76769e-33
EEF1A1	6.92492e-37	-0.268354	1	1	1.10279e-32
CAMK2D	3.09551e-36	-0.336902	0.126	0.333	4.92959e-32
CXCR4	4.81771e-36	0.37555	0.969	0.906	7.67221e-32
EEF1G	5.41044e-36	-0.306859	0.993	0.996	8.61612e-32
GNG7	7.17859e-36	0.27321	0.284	0.122	1.14319e-31
TP53INP1	7.3096e-36	0.264318	0.219	0.079	1.16405e-31
SNHG5	9.84517e-36	-0.39358	0.599	0.763	1.56784e-31
ENSG00000279088	1.44165e-35	-0.313322	0.105	0.304	2.29583e-31
OAZ1	1.62694e-35	-0.34481	0.975	0.987	2.5909e-31
IGFLR1	2.03607e-35	-0.369627	0.174	0.382	3.24244e-31
ENSG00000276216	2.1415e-35	0.463512	0.583	0.38	3.41034e-31
COPDA1+IGHG2	2.1616e-35	0.357719	0.404	0.218	3.44234e-31
ZFAS1	8.08506e-34	-0.370609	0.662	0.825	1.28755e-29
RGCC	2.34297e-33	0.290405	0.208	0.076	3.73117e-29
COX5A	3.88047e-33	-0.421041	0.372	0.561	6.17964e-29
PEBP1	6.6421e-32	-0.357326	0.686	0.83	1.05775e-27
EEF1B2	1.62182e-31	-0.306427	0.997	0.998	2.58275e-27
ENSG00000268355+LINC01480	2.06525e-31	-0.470814	0.073	0.244	3.28891e-27
PVT1	3.69698e-31	-0.29025	0.078	0.251	5.88744e-27
ENSG00000262202	8.21931e-31	0.392312	0.39	0.221	1.30893e-26
CD79B	4.62281e-30	0.360758	0.768	0.627	7.36183e-26
H3-3B	7.15547e-30	0.389668	0.989	0.985	1.13951e-25
ENSG00000256594	2.04253e-29	0.339632	0.503	0.321	3.25273e-25
SNORD3A	6.00314e-28	0.334082	0.442	0.269	9.56e-24
ARPC1B	9.73609e-28	-0.372727	0.575	0.724	1.55047e-23
PYHIN1	1.30517e-27	-0.251429	0.064	0.22	2.07848e-23
FTH1	2.146e-27	0.263821	0.997	0.99	3.4175e-23
ENSG00000285417	2.99205e-27	-0.472764	0.27	0.439	4.76484e-23
SNRPD2	4.87528e-27	-0.338244	0.636	0.758	7.76388e-23
HINT1	2.01981e-26	-0.338189	0.772	0.874	3.21654e-22
COX7C	2.72857e-26	-0.306654	0.872	0.933	4.34524e-22
HCST	3.14239e-26	-0.354663	0.448	0.615	5.00425e-22
H1-10	3.68589e-26	-0.261971	0.471	0.713	5.86978e-22
COX4I1	5.37948e-26	-0.296408	0.933	0.967	8.56682e-22
SEPTIN7	8.03786e-26	-0.316397	0.712	0.826	1.28003e-21
DDX5	1.9476e-25	-0.309122	0.919	0.951	3.10155e-21
NFKBIA	3.63209e-25	0.342047	0.374	0.219	5.78411e-21
CXXC5	4.31011e-25	0.259287	0.378	0.222	6.86385e-21
PRDX1	6.1279e-25	-0.352661	0.472	0.633	9.75869e-21
SEC62	1.54402e-24	0.308078	0.618	0.45	2.45884e-20
PGLS	3.40764e-24	-0.328006	0.325	0.488	5.42667e-20
BAX	4.06033e-24	-0.343161	0.494	0.638	6.46608e-20
TRAPPC1	2.16097e-23	-0.290672	0.304	0.47	3.44134e-19
STAG3	2.95538e-23	0.253743	0.259	0.129	4.70644e-19
HLA-DPB1	4.63765e-23	-0.486539	0.928	0.966	7.38546e-19
FCER2	2.40828e-22	-0.408127	0.4	0.538	3.83519e-18
KLF2	2.94426e-22	0.412492	0.421	0.28	4.68874e-18
UXT	3.80114e-22	-0.289871	0.532	0.677	6.05332e-18
HLA-A	1.24838e-21	0.304661	0.938	0.919	1.98804e-17
GAPDH	1.40115e-21	-0.346715	0.713	0.822	2.23134e-17
CAPG	1.83828e-21	-0.267518	0.208	0.368	2.92747e-17
OST4	3.06226e-21	-0.271014	0.829	0.899	4.87665e-17
CDKL1	4.29637e-21	-0.27895	0.168	0.319	6.84197e-17
C12orf57	4.39925e-21	-0.302243	0.339	0.495	7.00581e-17
LY6E	5.47872e-21	0.301622	0.59	0.452	8.72486e-17
LINC01857	1.09583e-20	-0.280167	0.144	0.292	1.7451e-16
RHOA	1.34532e-20	-0.272762	0.603	0.74	2.14243e-16
IGLC6	1.92166e-20	-0.4109	0.73	0.837	3.06024e-16
H3P6	2.95654e-20	0.273467	0.526	0.381	4.70829e-16
BTG1	4.72641e-20	0.387236	0.986	0.977	7.52681e-16
RHOB	2.90355e-19	-0.262921	0.172	0.316	4.6239e-15
IER2	7.18613e-19	0.253486	0.333	0.201	1.14439e-14
ENSG00000279602	7.47255e-19	0.321803	0.447	0.307	1.19e-14
STMN1	2.25228e-18	-0.256232	0.269	0.418	3.58675e-14
ROMO1	2.4945e-18	-0.261389	0.322	0.469	3.9725e-14
YBX3	4.39957e-18	0.268531	0.959	0.946	7.00632e-14
PCED1B-AS1	6.73433e-18	-0.258837	0.328	0.475	1.07244e-13
PSME1	1.4585e-17	0.254397	0.675	0.552	2.32267e-13
IRAG2	1.77201e-17	-0.278488	0.214	0.349	2.82193e-13
IFI6	4.89057e-17	0.377339	0.537	0.41	7.78823e-13
S100A6	9.66905e-17	0.298166	0.897	0.869	1.5398e-12
SLC25A3	1.28512e-16	-0.254964	0.425	0.561	2.04656e-12
ARHGAP44	1.93738e-16	-0.255332	0.204	0.336	3.08528e-12
SNORD3B-2	2.91132e-16	0.250944	0.396	0.267	4.63628e-12
NSMCE1	2.12084e-15	-0.254402	0.368	0.499	3.37744e-11
GABPB1-IT1	1.05791e-14	-0.269926	0.416	0.535	1.68472e-10
PARP15	1.4565e-14	-0.254492	0.348	0.475	2.31948e-10
ENSG00000224610	1.36406e-12	-0.259274	0.493	0.609	2.17226e-08
VIM	2.62228e-11	-0.306699	0.732	0.808	4.17598e-07
RGS2	1.24432e-10	-0.259423	0.135	0.23	1.98158e-06
PMAIP1	1.17231e-08	0.30528	0.734	0.693	0.00018669
ACTG1	8.09073e-08	-0.285189	0.579	0.635	0.00128845

## Sheet: Isoforms - Patient 1 Relpase
Supplemental Table S2. Full differential isoform expression results when comparing the BTK-mutated subclone to the original clone.
gene	p_val	avg_log2FC	pct.1	pct.2	p_val_adj	gene_base
MZB1:PB.52791.937	1.07904e-202	0.586098	0.39	0.038	1.09201e-197	MZB1
TXNIP:PB.7033.1439	2.23685e-173	1.15023	0.896	0.616	2.26373e-168	TXNIP
IGLL5:PB.140657.1541	5.55192e-139	-0.898796	0.192	0.692	5.61865e-134	IGLL5
IGLL5:PB.140657.1545	1.51035e-137	-1.06149	0.125	0.618	1.5285e-132	IGLL5
TXNIP:PB.7033.2312	2.00394e-129	0.902855	0.783	0.434	2.02802e-124	TXNIP
ADTRP:PB.56123.102	1.64762e-125	0.583974	0.464	0.123	1.66742e-120	ADTRP
LTB:PB.57485.3836	4.05706e-123	0.563035	0.343	0.063	4.10582e-118	LTB
VPREB3:PB.140727.320	2.63036e-115	0.772582	0.463	0.136	2.66198e-110	VPREB3
LTB:PB.57485.3835	4.53497e-110	0.868339	0.587	0.239	4.58948e-105	LTB
IFI27:PB.115417.143	7.48813e-101	0.397318	0.146	0.004	7.57813e-96	IFI27
LYST:PB.12938.392	4.65926e-93	0.297788	0.218	0.028	4.71527e-88	LYST
IFI27:PB.115417.145	4.94208e-91	0.313322	0.133	0.004	5.00148e-86	IFI27
BTG2:PB.10733.1	5.21108e-88	0.747319	0.915	0.754	5.27372e-83	BTG2
CD79A:PB.133805.3	5.80032e-81	0.649281	0.837	0.583	5.87004e-76	CD79A
JUNB:PB.132793.3214	1.22083e-76	0.705318	0.675	0.387	1.2355e-71	JUNB
ENSG00000268093+RPL18:PB.134286.1	2.55406e-76	-0.396708	1	1	2.58476e-71	ENSG00000268093+RPL18
CD37:PB.134314.377	2.84573e-73	0.598564	0.947	0.88	2.87993e-68	CD37
DYNLL1:PB.106062.370	4.26048e-73	-0.587758	0.104	0.425	4.31169e-68	DYNLL1
HLA-DMA:PB.57596.897	1.51097e-72	-0.638228	0.726	0.892	1.52913e-67	HLA-DMA
LHPP:PB.92536.247	3.04478e-70	0.404568	0.324	0.096	3.08138e-65	LHPP
HRK:PB.105919.47	5.11953e-70	0.319991	0.225	0.046	5.18107e-65	HRK
RACK1:PB.55043.6	3.91709e-64	-0.448454	0.993	0.998	3.96417e-59	RACK1
LINC00926:PB.117920.1172	1.08374e-60	0.39977	0.381	0.146	1.09676e-55	LINC00926
H3-3A:PB.12182.108	4.68572e-60	0.507159	0.851	0.687	4.74204e-55	H3-3A
UQCRH:PB.2713.39	5.25484e-60	-0.530648	0.611	0.816	5.318e-55	UQCRH
GAS5:PB.9245.843	7.65357e-60	-0.538909	0.45	0.708	7.74557e-55	GAS5
LINC00926:PB.117920.1224	2.65305e-55	0.30621	0.236	0.064	2.68494e-50	LINC00926
EVA1B:PB.1868.14	1.27189e-54	0.321745	0.272	0.084	1.28718e-49	EVA1B
PTMS:PB.100321.977	3.12165e-54	-0.388284	0.021	0.258	3.15917e-49	PTMS
IGLC2+IGLL5:PB.140657.1859	2.42105e-51	-0.626077	0.168	0.438	2.45015e-46	IGLC2+IGLL5
CYBA:PB.124099.6	4.5241e-50	0.4507	0.939	0.911	4.57848e-45	CYBA
ENSG00000279088:PB.89597.2053	5.30758e-49	-0.356632	0.038	0.265	5.37138e-44	ENSG00000279088
SNHG29:PB.124934.1	3.84771e-48	-0.483879	0.505	0.722	3.89396e-43	SNHG29
PFDN5:PB.102847.157	1.33446e-47	-0.466964	0.419	0.66	1.3505e-42	PFDN5
GSTP1:PB.96014.1	2.71214e-45	0.565118	0.655	0.461	2.74474e-40	GSTP1
GAS5:PB.9245.842	1.10917e-43	-0.444339	0.342	0.581	1.1225e-38	GAS5
HLA-B:PB.57485.1848	1.21344e-43	-0.32544	0.035	0.241	1.22802e-38	HLA-B
ATP6V1G1:PB.84878.226	1.16354e-41	0.425008	0.647	0.435	1.17752e-36	ATP6V1G1
ITGB1:PB.88319.188	5.0886e-41	0.284816	0.297	0.12	5.14977e-36	ITGB1
CALHM6:PB.61426.1	1.20063e-40	0.377946	0.472	0.256	1.21506e-35	CALHM6
CD99:PB.142446.603	1.22497e-40	-0.380602	0.114	0.34	1.23969e-35	CD99
NACA:PB.103020.876	1.51144e-39	-0.34631	0.99	0.998	1.52961e-34	NACA
PKIG:PB.137172.150	6.33293e-39	-0.308195	0.031	0.218	6.40905e-34	PKIG
ATP6V1G1:PB.84878.224	6.42534e-39	0.422025	0.639	0.455	6.50257e-34	ATP6V1G1
ENSG00000196656:PB.42713.1	2.05753e-38	-0.279724	1	1	2.08226e-33	ENSG00000196656
EEF1D:PB.79180.6	3.52629e-38	0.352111	0.416	0.219	3.56867e-33	EEF1D
TXNDC5:PB.55819.16	4.69167e-38	0.288173	0.291	0.12	4.74806e-33	TXNDC5
TRDC:PB.111255.23	1.1959e-37	-0.275915	0.002	0.165	1.21027e-32	TRDC
LAPTM5:PB.1573.37	6.75311e-37	-0.414925	0.608	0.781	6.83428e-32	LAPTM5
HLA-DQA1:PB.57584.965	9.46801e-37	-0.628826	0.516	0.694	9.58181e-32	HLA-DQA1
H3-3A:PB.12182.119	2.72951e-36	0.408671	0.65	0.462	2.76232e-31	H3-3A
DBI:PB.20169.20	1.148e-35	-0.543937	0.663	0.819	1.1618e-30	DBI
ENSG00000244398:PB.94016.157	1.29465e-35	-0.353257	0.83	0.934	1.31021e-30	ENSG00000244398
TRDC:PB.111255.109	1.77324e-35	-0.303899	0.003	0.158	1.79455e-30	TRDC
ENSG00000276216:PB.6981.2	2.69637e-32	0.43767	0.549	0.353	2.72878e-27	ENSG00000276216
B2M:PB.117146.1481	4.72697e-32	0.250459	0.25	0.104	4.78378e-27	B2M
EEF1G:PB.95745.752	6.17933e-32	-0.299688	0.991	0.994	6.25361e-27	EEF1G
CXCR4:PB.20913.354	1.14328e-31	0.361876	0.965	0.901	1.15702e-26	CXCR4
HLA-A:PB.57361.518	2.64136e-31	-0.261668	0.056	0.227	2.67311e-26	HLA-A
PEBP1:PB.105960.812	3.7293e-31	-0.358005	0.673	0.816	3.77413e-26	PEBP1
COX7C:PB.49856.3	3.08903e-30	-0.346835	0.794	0.893	3.12616e-25	COX7C
CCDC88A:PB.17028.873	4.72671e-30	-0.286108	0.076	0.251	4.78352e-25	CCDC88A
CD52:PB.1437.1	1.27313e-29	0.339322	0.931	0.831	1.28843e-24	CD52
CD79B:PB.127270.22	1.88763e-28	0.365594	0.679	0.521	1.91032e-23	CD79B
H1-10:PB.33125.1500	3.06508e-28	-0.301805	0.444	0.687	3.10192e-23	H1-10
HLA-C:PB.57485.119	3.19074e-28	0.254567	1	0.999	3.22909e-23	HLA-C
HLA-A:PB.57361.516	6.89379e-28	0.372251	0.86	0.787	6.97666e-23	HLA-A
SNORD3A:PB.125220.472	8.23058e-28	0.332017	0.447	0.269	8.32951e-23	SNORD3A
SNHG5:PB.59852.824	1.33016e-27	-0.347301	0.47	0.648	1.34615e-22	SNHG5
TSTD1:PB.8030.239	1.76122e-27	-0.381985	0.493	0.655	1.78239e-22	TSTD1
IGLC6:PB.140657.2452	5.65583e-27	-0.374623	0.232	0.419	5.72382e-22	IGLC6
COPDA1+IGHG2:PB.116052.1197	9.52754e-27	0.270694	0.306	0.158	9.64206e-22	COPDA1+IGHG2
FTH1:PB.95714.36	1.05009e-26	0.273221	0.998	0.983	1.06271e-21	FTH1
DUSP1:PB.54425.27	1.30627e-26	0.317553	0.387	0.221	1.32197e-21	DUSP1
COX5A:PB.118931.312	3.88842e-26	-0.364559	0.343	0.519	3.93516e-21	COX5A
ARPC1B:PB.68455.1	8.27744e-26	-0.355427	0.516	0.677	8.37693e-21	ARPC1B
SNRPD2:PB.134116.901	1.81292e-25	-0.331917	0.625	0.751	1.83472e-20	SNRPD2
CD74:PB.53525.177	6.63424e-25	0.300386	0.336	0.186	6.71398e-20	CD74
BTG1:PB.104584.1495	1.75059e-24	0.438793	0.98	0.972	1.77163e-19	BTG1
MIR155HG:PB.138942.18	3.38195e-24	-0.279734	0.124	0.288	3.4226e-19	MIR155HG
EEF1B2:PB.24549.320	3.65538e-24	-0.281136	0.993	0.996	3.69932e-19	EEF1B2
MEF2C:PB.50032.718	1.20683e-23	-0.273561	0.165	0.333	1.22134e-18	MEF2C
OAZ1:PB.132137.732	1.40375e-23	-0.323859	0.845	0.922	1.42062e-18	OAZ1
HINT1:PB.52476.28	1.71618e-23	-0.315661	0.745	0.852	1.73681e-18	HINT1
MYL6:PB.102993.232	1.9158e-23	-0.267469	0.17	0.338	1.93883e-18	MYL6
DYNLL1:PB.106062.371	2.59958e-23	0.334856	0.473	0.31	2.63083e-18	DYNLL1
SEC62:PB.35342.35	1.38406e-22	0.28088	0.53	0.364	1.4007e-17	SEC62
HLA-C:PB.57485.121	2.22183e-22	-0.306281	0.569	0.726	2.24853e-17	HLA-C
ZFAS1:PB.137423.1161	4.0633e-22	-0.310533	0.349	0.509	4.11214e-17	ZFAS1
UXT:PB.144595.1	2.69829e-21	-0.292667	0.495	0.645	2.73073e-16	UXT
TPT1:PB.108476.404	3.49386e-21	0.256468	1	0.999	3.53585e-16	TPT1
ENSG00000268355+LINC01480:PB.133797.626	6.63529e-21	-0.257103	0.032	0.148	6.71505e-16	ENSG00000268355+LINC01480
OST4:PB.15267.94	3.63179e-20	-0.27566	0.812	0.882	3.67544e-15	OST4
CD24:PB.60909.571	5.53396e-20	0.358067	0.817	0.756	5.60048e-15	CD24
PGLS:PB.132987.1929	9.37031e-20	-0.296054	0.295	0.446	9.48295e-15	PGLS
COX4I1:PB.123876.67	1.48533e-19	-0.269565	0.913	0.953	1.50318e-14	COX4I1
ZFAS1:PB.137423.1160	3.31484e-19	-0.272913	0.287	0.449	3.35468e-14	ZFAS1
KLF2:PB.132962.196	3.68863e-19	0.319323	0.323	0.196	3.73297e-14	KLF2
HCST:PB.133525.110	8.8249e-19	-0.270598	0.232	0.383	8.93097e-14	HCST
GAPDH:PB.100321.103	1.45557e-18	-0.305366	0.694	0.797	1.47307e-13	GAPDH
LY6E:PB.79109.3	1.75308e-18	0.271211	0.499	0.359	1.77415e-13	LY6E
HLA-DPB1:PB.57642.402	3.4544e-18	-0.444499	0.901	0.948	3.49592e-13	HLA-DPB1
PRDX1:PB.2645.1	1.18694e-17	-0.290528	0.413	0.556	1.20121e-12	PRDX1
IGLC6:PB.140657.2439	1.46481e-17	-0.373246	0.694	0.812	1.48242e-12	IGLC6
C12orf57:PB.100330.80	1.50882e-17	-0.265859	0.279	0.427	1.52696e-12	C12orf57
FCER2:PB.132575.25	4.01603e-17	-0.347299	0.346	0.472	4.0643e-12	FCER2
IFI6:PB.1481.1272	1.90438e-16	0.360891	0.495	0.369	1.92728e-11	IFI6
LAPTM5:PB.1573.1152	7.80002e-16	-0.268482	0.422	0.555	7.89377e-11	LAPTM5
BAX:PB.134307.1	1.47756e-15	-0.288092	0.398	0.514	1.49532e-10	BAX
S100A6:PB.7546.6	9.88557e-15	0.293996	0.879	0.852	1.00044e-09	S100A6
DDX5:PB.127323.476	1.19818e-14	-0.265777	0.616	0.708	1.21258e-09	DDX5
GABPB1-IT1:PB.117465.580	1.26045e-14	-0.269072	0.379	0.502	1.2756e-09	GABPB1-IT1
CD24:PB.60909.20	2.77628e-14	0.257102	0.575	0.451	2.80965e-09	CD24
ENSG00000279602:PB.126337.731	3.20198e-14	0.261151	0.401	0.278	3.24047e-09	ENSG00000279602
EEF1A1:PB.59297.356	5.2405e-14	-0.275568	0.656	0.74	5.30349e-09	EEF1A1
H3-3B:PB.127782.3080	7.98106e-12	0.271547	0.623	0.536	8.07699e-07	H3-3B
PMAIP1:PB.131161.51	6.41257e-07	0.271915	0.685	0.638	0.0648965	PMAIP1
MALAT1:PB.95882.698	0.24437	-0.368214	0.453	0.454	1	MALAT1
