# Supplementary material for: Long-read single-cell RNA sequencing enables the study of cancer subclone-specific genotypes and phenotypes in chronic lymphocytic leukemia
Source: HighWire-hosted journal article supplement (doi:10.1101/gr.279049.124), 2025-02-18
Supplement: Supplemental_Table_S3.xlsx [file Supplemental_Table_S3.xlsx]

## Sheet: Patient 1 - Subclone 1
Supplemental Table S3. Full differential gene expression results when comparing subclone 1 in the pre-treatment and relapse sample of patient 1.
gene	p_val	avg_log2FC	pct.1	pct.2	p_val_adj
ENSG00000289043	6.40011e-23	-0.259322	0.007	0.116	1.28002e-19
ENSG00000267120	1.65221e-21	-0.253772	0	0.14	3.30442e-18
SLC25A53	1.59881e-20	0.301085	0.095	0.977	3.19761e-17
BCYRN1	4.26106e-19	-0.37722	0.007	0.605	8.52212e-16
ENSG00000273391	4.45339e-18	0.335533	0.08	0.93	8.90678e-15
PVT1	5.2006e-18	-0.387046	0.139	1	1.04012e-14
MAGIX+PLP2	6.71107e-17	-0.351372	0.139	0.977	1.34221e-13
IGHG1+IGHG4	7.05702e-17	-0.273747	0.146	0.977	1.4114e-13
CNTNAP2	9.68524e-17	0.513763	0.058	0.14	1.93705e-13
ENSG00000233461	2.0465e-16	-0.313696	0.007	0.791	4.09301e-13
KLHL14	4.41712e-16	-0.496044	0.015	0.163	8.83424e-13
ENSG00000275981	7.11608e-16	0.265865	0.029	0.651	1.42322e-12
CAV1	1.20484e-15	-0.440625	0.007	0.186	2.40969e-12
VDAC3	1.61887e-15	-0.305089	0.073	0.884	3.23774e-12
SP100+SP140L	1.77423e-15	0.494568	0.139	0.977	3.54847e-12
ENSG00000264660	2.21835e-15	-0.331314	0.022	0.186	4.4367e-12
RNASEK-C17orf49	2.48071e-15	-0.349493	0.153	0.977	4.96142e-12
LST1	5.8775e-15	0.318706	0.036	0.767	1.1755e-11
CDKL3	8.45541e-15	-0.321722	0.029	0.698	1.69108e-11
CFAP20	7.30613e-14	0.513936	0.124	0.93	1.46123e-10
DLG2	9.03327e-14	0.26809	0.109	0.186	1.80665e-10
FAM111B	7.47471e-13	0.360816	0.146	0.209	1.49494e-09
C20orf96	1.29722e-12	0.360675	0.036	0.767	2.59444e-09
ENSG00000287190	1.5982e-12	0.277069	0.102	0.884	3.19641e-09
RGS1	2.14012e-12	0.375685	0.102	0.884	4.28024e-09
TIGIT	3.14987e-12	-0.407344	0.029	0.233	6.29974e-09
CRYBA4+ENSG00000286326	3.44374e-12	0.253922	0.073	0.791	6.88747e-09
ENSG00000287733+TMEM140	5.19048e-12	0.290413	0.197	1	1.0381e-08
NME1	5.26618e-12	-0.387291	0.095	0.86	1.05324e-08
ENSG00000275457	8.5805e-12	0.268327	0.051	0.814	1.7161e-08
MX2	2.00079e-11	-0.584953	0.248	1	4.00157e-08
GMDS	2.01451e-11	-0.71515	0.088	0.837	4.02903e-08
CD70	2.1006e-11	-0.344763	0.036	0.791	4.2012e-08
ENSG00000285782	2.65634e-10	-0.54651	0	0.186	5.31267e-07
CPNE5	5.70256e-10	-0.322267	0	0.256	1.14051e-06
IFI30	5.79575e-10	-0.260161	0.007	0.256	1.15915e-06
TRDC	9.86404e-10	0.351204	0.234	1	1.97281e-06
CA5B	1.22472e-09	0.295504	0.058	0.791	2.44945e-06
ZNF93	1.22472e-09	0.278304	0.058	0.791	2.44945e-06
ENSG00000289340	1.96113e-09	-0.357084	0.161	0.884	3.92227e-06
IGHG1+IGHGP	2.65382e-09	0.319667	0.088	0.791	5.30764e-06
ENSG00000268355+LINC01480	2.79898e-09	0.285045	0.234	0.977	5.59796e-06
ARHGEF18	3.01377e-09	0.594377	0.08	0.279	6.02754e-06
DDIT4	6.23857e-09	0.574831	0.241	1	1.24771e-05
LYST	7.69854e-09	0.811362	0.219	0.302	1.53971e-05
CLLU1	7.98797e-09	0.562809	0.036	0.535	1.59759e-05
FAM126A	8.14524e-09	0.488873	0.241	1	1.62905e-05
RASD1	8.14684e-09	0.506289	0.051	0.465	1.62937e-05
TVP23A	1.06866e-08	0.251764	0.051	0.767	2.13731e-05
MYL9	1.61138e-08	-0.434745	0.131	0.837	3.22276e-05
GS1-124K5.4	2.22175e-08	0.296002	0.036	0.721	4.44351e-05
LINC01857	2.50714e-08	-1.09434	0.299	0.93	5.01429e-05
ENSG00000275091	3.26298e-08	0.445083	0.124	0.837	6.52595e-05
PIK3CD-AS2	3.63533e-08	0.428582	0.168	0.884	7.27066e-05
BMP2K	4.61481e-08	0.378199	0.109	0.302	9.22963e-05
PYHIN1	7.31289e-08	-0.670464	0.19	0.86	0.000146258
FOS	8.4864e-08	0.830324	0.19	0.907	0.000169728
ENSG00000285827	9.14135e-08	0.27759	0.044	0.651	0.000182827
TSPAN13	1.16143e-07	0.264096	0.029	0.233	0.000232285
TXN	1.19477e-07	-0.467884	0.263	0.93	0.000238955
HLA-DQA1	1.45462e-07	-0.913866	0.766	1	0.000290924
ADAM28	1.76209e-07	-0.622092	0.073	0.302	0.000352419
ANKRD36	2.44298e-07	-0.397592	0.168	0.837	0.000488596
NPTX1	3.1847e-07	0.362727	0.19	0.86	0.000636939
TIMP1	4.22331e-07	-0.284536	0.204	0.884	0.000844662
NUDT1	4.39152e-07	-0.464423	0.234	0.907	0.000878305
GMNN	4.40627e-07	-0.252679	0	0.651	0.000881254
ENSG00000278238	4.63075e-07	0.276124	0.08	0.767	0.00092615
SYCP2	6.43864e-07	-0.254858	0	0.233	0.00128773
AJM1+PHPT1	6.69313e-07	-0.510498	0.029	0.302	0.00133863
LINC00158	6.72713e-07	0.331768	0.095	0.767	0.00134543
CD44	6.98681e-07	-0.337904	0.307	0.953	0.00139736
C16orf95-DT	9.22809e-07	-0.302843	0.007	0.558	0.00184562
MEF2C-AS1	9.85155e-07	-0.483943	0.095	0.767	0.00197031
IQCH-AS1	1.17348e-06	-0.277465	0.044	0.698	0.00234695
PLIN2	1.93093e-06	-0.351088	0.073	0.744	0.00386186
FCRL1	2.52108e-06	-0.386098	0.139	0.326	0.00504217
MRPL44	2.68064e-06	0.42224	0.161	0.837	0.00536129
ENSG00000273188	3.25491e-06	0.294092	0.051	0.605	0.00650983
RHOC	3.7012e-06	-0.419307	0.219	0.86	0.0074024
SLC27A5	6.83269e-06	0.266394	0.08	0.744	0.0136654
SELL	1.03342e-05	-0.362444	0.153	0.791	0.0206683
ENSG00000287092	1.09419e-05	-0.275554	0.139	0.349	0.0218838
ITM2A	1.20845e-05	-0.297995	0.314	0.953	0.024169
ZMYND8	1.89948e-05	-0.40749	0.161	0.349	0.0379895
C16orf74	2.05338e-05	0.502827	0.292	0.395	0.0410676
FCRL3	2.47322e-05	-0.405951	0.022	0.651	0.0494645
RASGRP3	2.71914e-05	-0.522726	0.139	0.767	0.0543828
TMEM128	2.95441e-05	-0.309072	0.007	0.651	0.0590881
COTL1	3.08861e-05	-0.595494	0.299	0.884	0.0617722
PPA1	3.10935e-05	0.328747	0.255	0.907	0.062187
ENSG00000224376	3.46362e-05	-0.45785	0.022	0.674	0.0692723
PKIG	3.58213e-05	-0.701043	0.226	0.814	0.0716426
FILIP1L	3.98756e-05	-0.485499	0.066	0.349	0.0797512
FCRL2	4.25394e-05	-0.610753	0.08	0.349	0.0850789
ALDH5A1	4.60332e-05	-0.62911	0.109	0.349	0.0920663
GADD45B	4.82973e-05	0.727758	0.277	0.93	0.0965946
IGLV1-44	5.49794e-05	0.294332	0.036	0.302	0.109959
RGS2	5.60966e-05	0.509174	0.197	0.837	0.112193
TPI1	6.34317e-05	-0.523114	0.292	0.86	0.126863
ENSG00000265206	6.49888e-05	-0.772042	0.139	0.744	0.129978
PSMG2	6.52412e-05	-0.652156	0	0.349	0.130482
IGFLR1	6.83082e-05	-0.278283	0.365	1	0.136616
PPP1R14B	0.000106741	0.731993	0.175	0.395	0.213481
ITGB1	0.000108993	0.53042	0.343	0.442	0.217986
PPIEL	0.000134411	-0.264637	0.015	0.605	0.268823
CLEC4G	0.000136921	-0.360719	0.007	0.326	0.273842
CAPG	0.000148943	-0.382291	0.314	0.884	0.297886
LDHA	0.000211735	-0.601893	0.175	0.767	0.423471
RHOB	0.000263252	-0.573845	0.292	0.837	0.526503
MAILR	0.000265107	-0.322154	0.168	0.767	0.530213
GAS5	0.000288229	-0.756552	0.774	1	0.576459
APOBEC3G	0.00029712	-0.434865	0.416	0.93	0.594239
ALOX5	0.000298449	-0.571191	0.058	0.372	0.596897
FCER2	0.000336966	-0.760926	0.518	0.977	0.673931
ITGB7	0.000370199	-0.318024	0.044	0.372	0.740398
ENSG00000285646	0.000376202	0.403566	0.204	0.814	0.752405
CD99	0.000415948	-0.831628	0.365	0.837	0.831895
ENO1	0.000427052	0.275688	0.321	0.93	0.854104
CEMIP2	0.00045429	0.29938	0.35	0.953	0.908579
CFLAR	0.000463196	-0.278076	0.263	0.837	0.926391
UQCRH	0.000477875	-0.735631	0.788	1	0.95575
BATF	0.000510238	-0.340964	0.022	0.372	1
NPM1	0.000568326	-0.573792	0.891	1	1
HSP90B1	0.000619734	0.255624	0.394	1	1
LINC02397	0.000621868	-0.295042	0.161	0.395	1
SNORD3B-2	0.000739126	0.558305	0.321	0.93	1
IFI27	0.000800061	1.43933	0.117	0.651	1
SNORD3B-1	0.000889454	0.282258	0.255	0.837	1
HLA-DPB1	0.000905638	-0.501542	0.912	1	1
BIRC3	0.000941398	-0.44217	0.182	0.395	1
LHPP	0.000959729	1.26936	0.438	0.558	1
NMB	0.00105542	-0.306383	0.095	0.698	1
HLA-DMA	0.00142511	-0.5616	0.847	1	1
ENSG00000262202	0.00144925	0.589035	0.343	0.953	1
KANK2	0.0015921	0.641411	0.263	0.465	1
TP53INP1	0.00171698	0.440257	0.124	0.721	1
CNN2	0.00172409	-0.271527	0.204	0.767	1
DUSP5	0.00195311	-0.37096	0.015	0.628	1
PLEKHG1	0.00197607	0.287356	0.292	0.465	1
SFTPB	0.00209469	-0.334035	0.066	0.651	1
ENSG00000236213	0.00253643	-0.394808	0.007	0.581	1
HLA-DQB1	0.00265068	-0.566014	0.708	1	1
LIMS1	0.00299163	-0.507485	0.241	0.767	1
IL10RA	0.00310495	-0.42734	0.036	0.395	1
ENSG00000259113	0.0035051	-0.44658	0.095	0.674	1
TMSB10	0.00351594	-0.341484	0.993	1	1
ENSG00000289341	0.00366942	0.331712	0.35	0.93	1
ZNF487	0.00369384	0.720314	0.182	0.767	1
NME2	0.00386948	-0.726044	0.723	1	1
HLA-DRA	0.00430524	-0.280701	0.971	1	1
PSME2	0.0047331	-0.353578	0.511	0.977	1
TAGLN2	0.00493418	-0.288089	0.489	0.977	1
MS4A1	0.00515533	-1.44317	0.088	0.651	1
TRAC	0.00521133	-0.577317	0.299	0.791	1
PIGR	0.00559013	-0.307125	0.088	0.651	1
PTMS	0.00635388	-0.863184	0.219	0.721	1
PRDX6	0.00642582	-0.325166	0.526	0.977	1
DBI	0.00688641	-0.283246	0.796	1	1
SMIM14	0.00749893	-0.252127	0.204	0.442	1
CCDC88A	0.0077144	-0.419634	0.613	0.953	1
CTSC	0.00775214	-0.444337	0.146	0.698	1
JRKL	0.00865295	-0.288754	0.007	0.349	1
LTB	0.00938669	0.293438	0.518	0.581	1
RAC2	0.0100007	-0.50385	0.409	0.837	1
JUNB	0.0101862	0.488631	0.577	0.628	1
HLA-DOB	0.0115879	-0.480008	0.307	0.791	1
CHD4	0.0120021	-0.620608	0.226	0.721	1
HCST	0.0122591	-0.267368	0.613	1	1
MIR155HG	0.0126002	-0.300412	0.409	0.884	1
LIME1	0.0137037	-0.276765	0.044	0.419	1
TYMP	0.0138821	-0.467792	0.051	0.628	1
SNHG17	0.0142782	0.295594	0.139	0.698	1
IL10RB	0.0144551	0.684378	0.109	0.674	1
ENSG00000277283	0.0150471	0.356802	0.051	0.605	1
LY96	0.0153998	-0.336122	0.088	0.651	1
DMKN	0.0154339	-0.313237	0.255	0.767	1
TPM3	0.0166556	-0.445488	0.635	0.93	1
ENSG00000272917	0.0173354	-0.429579	0.036	0.419	1
TXNIP	0.0190119	0.611333	0.912	1	1
RNASE6	0.0191722	-0.420721	0.058	0.628	1
SPRY2	0.0199406	-0.337125	0.007	0.349	1
HLA-DRB5	0.0208446	-0.432314	0.825	1	1
IGFBP4	0.0218353	-0.749413	0.029	0.419	1
BBOF1	0.0219999	-0.331474	0.007	0.442	1
ARPC1B	0.0227886	-0.449574	0.708	0.977	1
FLNA	0.0243051	-0.286945	0.139	0.674	1
BTG2	0.0245854	0.53895	0.927	0.93	1
BAX	0.0247559	-0.533257	0.693	0.977	1
TNFRSF13B	0.0266774	-0.278939	0.19	0.465	1
DPEP2	0.0269191	-0.319882	0.139	0.674	1
ENSG00000258857	0.0290012	0.418219	0.153	0.698	1
ENSG00000285417	0.0292144	-0.478276	0.431	0.86	1
RRBP1	0.0300207	0.680301	0.255	0.791	1
VIM	0.0304248	-0.524615	0.796	0.977	1
RGCC	0.0329742	0.438044	0.131	0.465	1
GAPDH	0.0352624	-0.465223	0.839	1	1
PFN1	0.0355737	-0.351995	0.737	0.977	1
SEC11C	0.0355894	-0.368194	0.343	0.791	1
MMP17	0.035907	-0.433628	0.015	0.209	1
FAM3C	0.0368682	0.389278	0.365	0.558	1
IGLL5	0.0391517	-0.499833	0.599	0.907	1
PCED1B	0.0393833	-0.264108	0.161	0.674	1
CES4A	0.039579	-0.280874	0	0.302	1
ATF5	0.0399646	-0.496818	0.044	0.605	1
LINC00173	0.0420536	-0.45116	0.007	0.581	1
ARPC2	0.0440958	-0.394497	0.686	0.93	1
ADTRP	0.0465529	0.55721	0.474	0.628	1
H2BC4	0.0467366	0.262388	0.168	0.698	1
GKAP1	0.0534742	0.373205	0.102	0.465	1
IFT88	0.0548286	-0.355748	0.007	0.419	1
MIR3681HG	0.0550769	-0.358428	0.051	0.581	1
IGLC2	0.0560785	-1.0101	0.015	0.581	1
HLA-DRB1	0.0566457	-0.356619	0.891	1	1
CARD16	0.0574353	-0.443626	0.139	0.465	1
PLP2	0.0590359	-0.450073	0.255	0.721	1
AIM2	0.0597464	-0.34423	0.416	0.791	1
S100A10	0.0611862	-0.263005	0.029	0.279	1
PARP4	0.0613029	-0.283657	0.204	0.698	1
ACTG1	0.0616913	-0.511383	0.657	0.907	1
SNHG5	0.0728738	-0.311885	0.686	0.953	1
IGHA1	0.0763628	-0.522251	0.445	0.791	1
LBH	0.0813224	-0.507043	0.431	0.791	1
TMEM191A	0.0851041	0.328763	0.058	0.605	1
HINT1	0.0868101	-0.282161	0.839	0.977	1
PLEK	0.0875909	-0.538752	0.022	0.419	1
ENSG00000170846	0.0905125	-0.312991	0.007	0.372	1
PTRHD1	0.0914429	-0.290352	0.197	0.674	1
IL17REL	0.0976211	-0.294428	0	0.163	1
HSPA5	0.101457	-0.372149	0.263	0.721	1
HRK	0.105886	0.547521	0.146	0.651	1
ENSG00000274092	0.107107	0.303092	0.036	0.442	1
ENSG00000251002	0.111488	-0.31803	0.153	0.488	1
ENSG00000272256	0.122958	0.512767	0.328	0.814	1
H1-10	0.123114	-0.298847	0.599	0.907	1
TPM2	0.123912	0.46567	0.358	0.837	1
HS3ST1	0.13231	1.22694	0.431	1	1
PYCARD	0.142428	-0.356131	0.343	0.744	1
ABRACL	0.147398	-0.362594	0.168	0.651	1
CD27	0.150165	0.297914	0.686	0.791	1
RALGPS2	0.154573	-0.342958	0.321	0.535	1
METTL8	0.179598	-0.507112	0.19	0.651	1
MARCKSL1	0.187342	0.58384	0.212	0.698	1
TAS2R14	0.20503	-0.257085	0.036	0.465	1
IGLC7	0.211247	0.400394	0.591	0.953	1
MAD1L1	0.213607	0.276643	0.124	0.628	1
LGALS1	0.220166	0.478702	0.65	0.814	1
TMLHE	0.225605	-0.307724	0.029	0.465	1
JUN	0.236596	-0.29404	0.715	0.977	1
RBBP8	0.23903	0.388175	0.058	0.581	1
SNHG29	0.242045	-0.283697	0.788	1	1
DAGLB	0.251637	-0.666304	0.007	0.512	1
LDLRAD4	0.254796	0.72609	0.19	0.674	1
HSP90AB1	0.257414	-0.268139	0.723	0.93	1
MAN1A1	0.258878	-0.39968	0.212	0.651	1
ENTPD3-AS1	0.263298	0.255604	0.044	0.465	1
BTG1-DT	0.264276	0.389262	0.46	0.884	1
IFI6	0.269501	1.45313	0.562	1	1
CCDC18	0.273739	-0.356991	0.029	0.558	1
CKLF-CMTM1	0.278544	-0.677766	0.095	0.488	1
DEPP1	0.289077	0.561804	0.066	0.256	1
H2BC5	0.302751	-0.336067	0.08	0.488	1
MTRFR	0.324762	0.343696	0.146	0.628	1
NIBAN3	0.345564	-0.489842	0.19	0.628	1
H2AC6	0.349943	-0.352702	0.336	0.698	1
H2AC19	0.365849	0.511283	0.394	0.674	1
PRDX2	0.377131	-0.304859	0.131	0.605	1
SAT1	0.381418	0.54111	0.679	0.977	1
CLECL1	0.385863	-0.332374	0.321	0.698	1
PITPNA-AS1	0.38835	0.454435	0.146	0.628	1
IGFLR1+U2AF1L4	0.405945	-0.700374	0.153	0.512	1
CENPM	0.412159	-0.524753	0.051	0.488	1
CCNG2	0.413052	-0.401921	0.007	0.535	1
TYROBP	0.42287	-0.285094	0.095	0.581	1
IFI44L	0.433243	0.603143	0.474	1	1
STAT1	0.433823	0.315076	0.533	0.953	1
PPP1R15A	0.436764	0.380558	0.409	0.698	1
GSTP1	0.442256	-0.253344	0.657	0.837	1
EVA1B	0.443548	0.480084	0.219	0.581	1
ZCCHC9	0.461541	0.477092	0.088	0.581	1
MIS18BP1	0.468248	-0.390114	0.285	0.581	1
ENSG00000183308	0.483991	-0.260969	0.007	0.465	1
MYO3A	0.484967	-0.384053	0.036	0.488	1
ASB8	0.487666	-0.457137	0.036	0.488	1
MALAT1+NEAT1	0.489519	-0.355849	0.985	1	1
COPDA1+IGHG2	0.496971	-0.266952	0.321	0.674	1
ENSG00000254732+TMX2	0.507597	0.253055	0.569	1	1
HSPA8	0.508485	-0.514605	0.321	0.651	1
SMC4	0.512535	-0.276627	0.109	0.581	1
ENSG00000288827	0.529411	0.299448	0.073	0.512	1
DUSP1	0.545712	0.399604	0.372	0.674	1
C1orf162	0.54628	0.636614	0.197	0.581	1
ZNF143	0.594457	0.260143	0.066	0.512	1
GPM6A	0.602464	-0.476414	0.022	0.488	1
SNORD3A	0.633475	0.712215	0.423	0.837	1
MYB	0.642129	0.342938	0.058	0.465	1
HSPD1	0.663495	-0.407272	0.182	0.605	1
NEAT1	0.670834	-0.402034	0.416	0.698	1
SPI1	0.671903	0.490542	0.139	0.558	1
SPN	0.677454	-0.3923	0.015	0.512	1
SP140	0.681875	-0.353561	0.226	0.628	1
ISG15	0.691036	-0.303585	0.737	1	1
LINC00663	0.691751	-0.344887	0.007	0.442	1
ENSG00000226571	0.706872	-0.600889	0.226	0.605	1
BOLA3	0.712782	0.277825	0.139	0.558	1
SPIB	0.723547	-0.517823	0.204	0.605	1
ENSG00000276216	0.73478	0.592209	0.555	0.977	1
ABCA6	0.736857	-0.306328	0.321	0.605	1
ZNF749	0.756801	0.52191	0.153	0.605	1
ANKRD36C	0.774753	-0.297118	0.153	0.558	1
TBXT	0.781675	-0.280458	0.007	0.256	1
PHF19	0.78566	-0.458191	0.051	0.535	1
ENSG00000278376	0.798158	-0.37378	0.022	0.465	1
AKAP8L	0.800448	0.355079	0.285	0.651	1
ENSG00000250850	0.817931	-0.394508	0.161	0.581	1
DNPH1	0.826798	-0.717051	0.131	0.535	1
ENSG00000279140	0.835063	0.345906	0.051	0.535	1
BIK	0.849383	-0.425758	0.058	0.535	1
ENSG00000285884	0.851687	0.304129	0.051	0.535	1
IGHM	0.860374	0.443523	0.504	0.884	1
IGHV5-78	0.861889	0.302661	0.073	0.535	1
HNRNPAB	0.875378	-0.302937	0.241	0.605	1
ANXA6	0.879215	-0.575235	0.124	0.558	1
COL19A1	0.882276	-0.296989	0.088	0.535	1
FAM133DP	0.909878	-0.356639	0.109	0.558	1
NOP10	0.925876	-0.358067	0.248	0.605	1
IRAG2	0.977217	-0.439397	0.358	0.628	1
XBP1	0.983377	1.07271	0.467	0.884	1
ATOX1	0.991545	-0.290104	0.394	0.651	1
EIF5B	0.997192	0.254321	0.409	0.744	1

## Sheet: Patient 1 - Subclone 3
Supplemental Table S3. Full differential gene expression results when comparing subclone 3 in the pre-treatment and relapse sample of patient 1.
gene	p_val	avg_log2FC	pct.1	pct.2	p_val_adj
ENSG00000287733+TMEM140	1.35052e-08	-0.403551	0	1	2.70105e-05
PITPNA-AS1	2.93844e-07	-1.24196	0.048	1	0.000587687
IFI44	3.50679e-07	-0.564386	0.048	1	0.000701357
ENSG00000270022	4.18054e-07	0.355145	0.048	1	0.000836109
C1orf112	6.78272e-07	-0.407216	0	0.938	0.00135654
MACORIS	6.78272e-07	-0.578079	0	0.938	0.00135654
TUBB2A	6.78272e-07	-0.327669	0	0.938	0.00135654
MFSD1P1	6.78272e-07	-0.326585	0	0.938	0.00135654
GLCE	1.35268e-06	-0.491071	0.048	0.938	0.00270536
TUBB6	1.60302e-06	0.299516	0.048	0.938	0.00320603
IFIT1	1.60302e-06	0.358621	0.048	0.938	0.00320603
ENSG00000230551	2.72291e-06	-0.338539	0	0.875	0.00544583
ENSG00000230074	2.72291e-06	-0.303668	0	0.875	0.00544583
MT2A	4.25261e-06	-0.590669	0.095	1	0.00850522
GSDME	5.82322e-06	-0.253296	0.095	1	0.0116464
TBXAS1	7.94065e-06	0.319129	0.095	1	0.0158813
SLC25A53	7.94065e-06	0.613183	0.095	1	0.0158813
ID1	9.60449e-06	-0.333343	0.048	0.938	0.019209
SMKR1	1.28912e-05	-0.257546	0	0.688	0.0257823
OAS3	1.93337e-05	0.316633	0.048	0.812	0.0386674
TNFRSF17	1.96363e-05	0.505596	0.095	0.125	0.0392726
LMO7-AS1	2.08656e-05	-0.457116	0	0.875	0.0417311
ENSG00000203279	2.08656e-05	-0.4679	0	0.875	0.0417311
ENSG00000289043	2.08656e-05	-0.45423	0	0.125	0.0417311
ADGRE5	2.08656e-05	-0.494072	0	0.125	0.0417311
LINC00996	2.7642e-05	-0.344086	0.048	0.125	0.055284
KLK1	7.11818e-05	-0.508542	0.095	0.938	0.142364
HLA-DPB2	7.52207e-05	0.27886	0.143	1	0.150441
ENSG00000285417	0.000112791	-1.71793	0.333	1	0.225582
ENSG00000273188	0.000120222	0.266489	0.048	0.812	0.240445
SMIM3	0.000129427	-0.367913	0	0.562	0.258853
TUBB4B	0.000171341	-0.632917	0.19	1	0.342682
CD2AP-DT	0.000195758	0.804202	0.048	0.875	0.391515
STMN1P1	0.000238168	-0.426765	0	0.75	0.476335
CAV1	0.000238168	-0.641894	0	0.125	0.476335
ENSG00000275180	0.000238168	-0.287632	0	0.75	0.476335
MYBL2	0.0002465	0.464854	0.143	0.188	0.493001
TADA2B	0.000351413	0.293344	0.095	0.875	0.702826
IGHG1+IGHG4	0.000359562	-0.840243	0.143	0.938	0.719125
ENSG00000251661	0.000395065	-0.500518	0	0.812	0.79013
ENSG00000264660	0.000395065	-0.396734	0	0.188	0.79013
EMC3-AS1	0.000578209	0.270637	0.048	0.812	1
SNORD3B-2	0.000591813	0.364754	0.19	1	1
ENSG00000289558+SS18L2	0.000606906	0.313241	0.095	0.75	1
PKIB	0.000727614	-0.399596	0	0.688	1
TBC1D22A-DT	0.000744622	0.262705	0.143	0.938	1
DDIT4	0.000749433	0.431624	0.19	1	1
TRPM4	0.000819974	-0.490652	0.095	0.875	1
TUBB	0.000819974	-0.380326	0.095	0.875	1
FOSB	0.000842112	0.609742	0.19	1	1
CORO1B+PTPRCAP	0.000858524	-1.28903	0.714	0.938	1
CLEC4C	0.000940824	0.402137	0.143	0.938	1
SLC25A4	0.000941568	0.484619	0.143	0.938	1
ENSG00000280077	0.000941568	0.60465	0.143	0.938	1
EIF3A	0.000941568	-1.32603	0.143	0.875	1
PPA1	0.00103795	-0.254311	0.095	0.875	1
ENSG00000233970	0.00106375	-0.440381	0	0.562	1
CTNNA1-AS1	0.00106375	-0.334854	0	0.562	1
NUF2	0.00106375	-0.302727	0	0.562	1
FCRL3	0.00118656	-0.296392	0	0.75	1
ENSG00000289588	0.00118656	-0.253567	0	0.75	1
C2orf76	0.00130853	0.482663	0.095	0.875	1
ENSG00000259001	0.00130853	0.255941	0.095	0.875	1
ENSG00000250461	0.00132947	0.75681	0.19	0.25	1
CDKN2C	0.00142098	-0.328542	0.048	0.75	1
TPM2	0.00146627	-0.404529	0.238	1	1
PTER	0.00159632	-0.782892	0.048	0.812	1
LRRC42	0.00160023	0.515349	0.048	0.75	1
TLE1	0.00178911	-0.817946	0.048	0.812	1
HLA-DMA	0.0018556	-1.25965	0.857	1	1
NUBPL	0.00224034	0.523793	0.048	0.812	1
RBBP8	0.00224034	0.331337	0.048	0.812	1
TIMP1	0.0025587	-1.41195	0.095	0.812	1
GPX1	0.00261214	-0.793489	0.333	1	1
GCNT2	0.00295427	-0.368907	0	0.5	1
CD68	0.00318817	-0.304576	0.143	0.875	1
PVT1	0.00343906	0.433481	0.238	1	1
BTG1-DT	0.00343906	-0.554116	0.238	0.938	1
AKAP12	0.00354094	-0.784295	0.143	0.875	1
CRYZ	0.00354094	-0.304259	0.143	0.875	1
IGHG4	0.00379307	-1.35093	0.524	1	1
RGS2	0.00421573	0.670475	0.238	1	1
IGHV5-78	0.0043075	0.527797	0.19	0.938	1
ENSG00000233461	0.00463598	-0.258737	0	0.75	1
KMO	0.00463598	-0.274189	0	0.25	1
THUMPD2	0.00463598	-0.51655	0	0.75	1
ZNF827	0.00463598	-1.0805	0	0.75	1
H2BC5	0.00463598	-0.5911	0	0.75	1
KIF9	0.00463598	-0.318862	0	0.75	1
HLA-DPB1	0.00552662	-0.845966	0.905	1	1
MDK	0.00571885	0.547051	0.048	0.75	1
RNH1	0.0064035	-0.548362	0.333	1	1
ENSG00000279088	0.0064035	-0.544766	0.333	1	1
SDF2L1	0.00651066	0.521677	0.143	0.875	1
C1orf162	0.0065356	-0.760792	0.095	0.812	1
C1QBP	0.00667262	-0.587726	0.286	0.938	1
ANKRD18DP+ENSG00000286755	0.00731377	-0.350876	0	0.312	1
ATP2B1	0.00733964	0.518328	0.286	0.312	1
CDKN2A	0.00806588	-0.458559	0.286	1	1
RBM38-AS1	0.00868825	-0.383838	0	0.188	1
RN7SKP261	0.00886631	0.364365	0.095	0.562	1
H1-5	0.00948825	-0.380342	0.048	0.25	1
ENSG00000258857	0.00966011	0.429657	0.095	0.812	1
CFAP20	0.00966011	0.351802	0.095	0.812	1
CDKL3	0.00966011	0.425878	0.095	0.812	1
ZNF236-DT	0.00966011	0.290291	0.095	0.812	1
ENSG00000279555	0.0115574	0.565593	0.143	0.312	1
SF1-DT	0.0115574	0.753838	0.143	0.312	1
AIM2	0.0116561	-0.33932	0.286	0.938	1
ENSG00000223478	0.0118092	-0.450355	0	0.688	1
FBP1	0.0118092	-0.5955	0	0.25	1
LINC02416	0.0118092	-0.309055	0	0.688	1
IGHA1	0.0118525	-0.951154	0.571	1	1
FAM133DP	0.0126744	0.543077	0.143	0.312	1
VAMP5+VAMP8	0.0127178	-0.598739	0.381	1	1
ENSG00000285667	0.0136609	0.543606	0.048	0.688	1
MBTPS1-DT	0.0136609	0.261237	0.048	0.688	1
RGP1	0.0136609	0.275844	0.048	0.688	1
ENSG00000234936+LINC01126	0.0142886	-0.288349	0	0.5	1
HOXB-AS1	0.0142886	-0.423293	0	0.5	1
XAF1	0.0145778	-0.568415	0.333	1	1
LY96	0.0151983	-0.585441	0.143	0.812	1
LMNA	0.0154475	-0.392022	0.048	0.75	1
ENSG00000285884	0.0154475	-0.271449	0.048	0.75	1
C15orf61	0.0165989	0.416749	0.286	1	1
LAG3	0.0166188	-0.778723	0.143	0.812	1
GIHCG	0.0168496	0.688704	0.095	0.312	1
ENSG00000268355+LINC01480	0.0172207	0.441477	0.238	0.938	1
CRIP1	0.0177464	-0.315058	0.19	0.875	1
TESC	0.0177464	-1.20168	0.19	0.812	1
S100A10	0.0182821	-0.259185	0	0.25	1
ENSG00000257341	0.0187664	-1.36193	0.714	1	1
SPIB	0.0196997	0.535993	0.286	0.375	1
LY6E	0.020143	-0.846438	0.429	1	1
METTL8	0.020524	0.379551	0.333	0.375	1
CD27	0.0210764	-0.953621	0.524	0.938	1
PIGR	0.0210908	0.290487	0.19	0.875	1
ENSG00000248993	0.0210908	-1.03662	0.19	0.812	1
SUSD1	0.0211776	0.378898	0.095	0.75	1
MEIG1	0.0211776	0.623432	0.095	0.75	1
RCN1	0.0212413	-0.397667	0	0.188	1
CHAF1A	0.0218131	-0.338711	0.048	0.25	1
HLA-DRB5	0.0222159	-0.694174	0.762	1	1
RGS1	0.023295	1.10454	0.286	1	1
ENSG00000277368	0.0234019	0.312334	0.048	0.562	1
CASP4LP	0.0234019	0.323473	0.048	0.562	1
FXYD1	0.0239386	-0.363121	0.095	0.312	1
ASB8	0.0241522	0.371044	0.048	0.312	1
SNHG15	0.0249621	0.637329	0.19	0.875	1
MUC12-AS1	0.0249717	0.793575	0.19	0.875	1
SATB1	0.027966	-0.444721	0	0.25	1
ZNF330	0.027966	-0.251927	0	0.625	1
HLA-DRA	0.0283721	-0.551745	0.905	1	1
IFI6	0.0304733	1.33477	0.762	1	1
HLA-DQA1	0.0329092	-0.807742	0.762	1	1
APOD	0.0340707	-1.50385	0	0.312	1
RGCC	0.0340707	-1.25867	0	0.688	1
H2AC14	0.0340707	-0.728197	0	0.688	1
ENSG00000289558	0.0340707	-0.304063	0	0.688	1
CROT	0.0340707	-0.251362	0	0.688	1
ARHGAP10	0.0340707	-1.01068	0	0.688	1
SPI1	0.0340707	-0.840897	0	0.688	1
HDAC4-AS1	0.0340707	-0.412282	0	0.688	1
ACSM3	0.0340707	-0.36505	0	0.312	1
CCL5	0.0342288	-0.457121	0	0.438	1
ENSG00000260990	0.0342288	-0.262025	0	0.125	1
SRMS	0.0342288	-0.352367	0	0.438	1
HLA-DOB	0.0348651	0.436332	0.286	0.938	1
ISG20	0.0356192	-0.675378	0.81	1	1
LGR6	0.0364144	0.524109	0.095	0.625	1
SERPINB1	0.0389725	-0.308942	0.333	0.938	1
HLA-DPA1	0.0400789	-0.609911	0.381	0.938	1
IGLC5	0.0405305	0.741285	0.19	0.375	1
ARPC1B	0.0413605	-0.711954	0.81	1	1
HLA-DRB1	0.0414691	-0.492683	0.905	1	1
PHF13	0.0431824	0.654382	0.048	0.25	1
LINC01569	0.0436423	0.387175	0.095	0.688	1
ENSG00000271746	0.0436423	0.433125	0.095	0.688	1
ATP2A1	0.0498293	0.52696	0.095	0.75	1
TARS3	0.0498293	0.28227	0.095	0.75	1
HERC2P3	0.0498293	0.35664	0.095	0.75	1
BIK	0.0525212	0.302146	0.143	0.375	1
IRAG2	0.0560715	0.767015	0.476	0.5	1
EVI2B	0.0571225	-1.14408	0.238	0.75	1
LGALS1	0.05757	-0.833724	0.571	0.938	1
TRDC	0.0591591	-0.631237	0.429	1	1
ITM2A	0.0591591	-0.283748	0.429	1	1
CFLAR	0.0609764	-0.976924	0.143	0.75	1
PPIEL	0.0615936	-0.390968	0	0.562	1
ARPC2	0.0633184	-0.426153	0.762	1	1
BCYRN1	0.0641355	0.305904	0.048	0.562	1
STK32B	0.0641355	0.275925	0.048	0.562	1
RHOB	0.0652056	-0.52703	0.333	0.875	1
CD44	0.0652056	-0.507458	0.333	0.875	1
TMSB4X	0.0681385	-0.350676	0.952	1	1
TMSB10	0.0681385	-0.316908	0.952	1	1
FCRL5	0.0683786	-0.431828	0.19	0.375	1
NFKBIA	0.0699356	1.08205	0.333	1	1
NMB	0.0705295	-0.484794	0.143	0.75	1
FCMR	0.0719531	-0.536698	0.667	1	1
IFITM1	0.0728359	-1.16983	0.857	1	1
AMT	0.0728934	-0.70564	0	0.625	1
ENSG00000272256	0.0757478	-0.403122	0.143	0.75	1
PTTG1	0.0759835	0.482884	0.238	0.875	1
ENSG00000267282	0.0773166	0.262928	0.048	0.375	1
CD52	0.0777621	-0.533175	0.81	1	1
ENSG00000287190	0.0802409	1.2137	0.333	1	1
BAX	0.0826128	-0.767771	0.714	1	1
RAD9A	0.0853866	0.551556	0.048	0.688	1
HHAT	0.0853866	0.294593	0.048	0.688	1
H1-2	0.0872665	-0.725459	0.619	1	1
CSKMT	0.0903647	1.77171	0.19	0.812	1
GADD45B	0.0903647	0.704346	0.19	0.812	1
CAPG	0.0915288	-0.321673	0.524	1	1
LINC01857	0.0935971	-0.365337	0.381	0.938	1
CLIC1	0.0943689	-0.673533	0.762	0.938	1
CD74	0.0947603	-0.438131	1	1	1
ENSG00000260585	0.0948901	0.446292	0.095	0.688	1
PTRHD1	0.0957677	-0.38382	0.286	0.812	1
H2BC12	0.0996421	-1.01733	0.238	0.75	1
TXNIP	0.10057	-0.634869	0.762	1	1
ENSG00000219409	0.104205	0.288913	0.048	0.25	1
RNASEK-C17orf49	0.104543	0.349322	0.333	0.938	1
HVCN1	0.106748	-0.774751	0.143	0.375	1
TICAM2	0.108841	-0.372912	0	0.125	1
ENSG00000262202	0.111453	1.0177	0.333	0.938	1
IGHV3-30	0.112594	0.386418	0.048	0.375	1
LIMS1	0.114016	0.500717	0.143	0.75	1
FAM111B	0.120366	-0.767468	0.048	0.375	1
HLA-DQB1	0.121138	-0.357524	0.762	1	1
ARIH2OS	0.121668	0.284865	0.143	0.75	1
ACOT13	0.121668	0.559593	0.143	0.75	1
CHD4	0.122609	0.307763	0.429	0.5	1
ENSG00000286705	0.126107	-0.353673	0	0.5	1
SAT1	0.127863	-0.548675	0.667	0.938	1
ENSG00000273338	0.136572	-0.388953	0.381	0.938	1
IGLC3	0.140116	0.607321	0.286	0.875	1
ENSG00000285756	0.140216	-0.311514	0.048	0.625	1
DAGLB	0.141635	0.286966	0.095	0.375	1
MAD1L1	0.142191	0.367253	0.19	0.438	1
EAF2	0.142191	-0.308234	0.19	0.75	1
IFITM2	0.142465	-0.624523	0.571	0.938	1
MX2	0.142751	0.669271	0.333	0.938	1
IGLC2+IGLL5	0.143998	1.76986	0.667	1	1
TMEM53	0.144479	-0.404302	0	0.562	1
LTC4S	0.144479	0.264837	0.048	0.562	1
BACE2	0.144479	-0.561653	0	0.312	1
ENSG00000286104	0.144479	-0.471598	0	0.562	1
SNORD3A	0.145024	1.19275	0.381	1	1
GAPDH	0.145312	-0.721494	0.905	1	1
TRAC	0.145737	-0.784771	0.238	0.75	1
HSPE1	0.151543	-0.470261	0.333	0.812	1
CLEC2D	0.15164	0.669097	0.19	0.75	1
TTN	0.15387	-0.970593	0.381	0.812	1
GAS5	0.153901	-0.549134	0.857	1	1
RACK1	0.153974	-0.414478	0.952	1	1
RASGRP2	0.159377	-0.816759	0	0.375	1
SPACA9	0.159377	-0.425454	0	0.625	1
ING2	0.159377	-0.28675	0	0.625	1
AJM1+PHPT1	0.159377	-0.366121	0	0.375	1
CCDC112	0.159377	-0.693738	0	0.375	1
ENSG00000183308	0.159377	-0.268891	0	0.625	1
MIR4458HG	0.159377	-0.651903	0	0.625	1
IL10RA	0.159377	-0.864611	0	0.375	1
TRIM34	0.159377	-0.633826	0	0.625	1
MALAT1	0.163048	0.408862	1	1	1
CLECL1	0.164283	0.357977	0.238	0.812	1
SELL	0.167533	0.482349	0.286	0.875	1
ENSG00000288964	0.16967	0.768707	0.095	0.625	1
MAN1A1	0.170403	-0.528776	0.19	0.75	1
RHOC	0.180393	-0.587753	0.333	0.812	1
SPTY2D1	0.181847	0.58209	0.095	0.688	1
ENSG00000215302+ENSG00000270055	0.181847	0.326147	0.095	0.688	1
NAPSB	0.182083	-0.702048	0.81	1	1
UQCRH	0.182316	-0.806197	0.905	1	1
IGFLR1+U2AF1L4	0.186931	-0.829775	0.143	0.688	1
NBPF20	0.19805	0.348916	0.143	0.438	1
LRRC51	0.19962	0.357793	0.048	0.375	1
ENSG00000289340	0.202614	0.274231	0.19	0.75	1
FOS	0.206618	0.957398	0.238	0.812	1
ODC1	0.206618	-0.320402	0.238	0.75	1
HSPA8	0.210111	-0.627916	0.286	0.438	1
FCER2	0.213429	-0.540967	0.714	1	1
FAM126A	0.215734	0.765606	0.381	1	1
STMN1	0.217915	-0.444513	0.429	0.875	1
SFTPB	0.221724	-0.320848	0.143	0.688	1
ID3	0.225639	1.0005	0.81	1	1
KLF6	0.225804	0.591316	0.857	0.938	1
ENSG00000259976	0.226422	0.320299	0.19	0.75	1
TMCC1-DT	0.232168	0.338641	0.048	0.438	1
ENSG00000235672	0.232168	0.337238	0.048	0.438	1
CD79A	0.236322	-0.462189	0.667	0.938	1
VIM	0.236909	-0.380248	0.714	1	1
KLF2	0.237224	0.323937	0.333	0.875	1
IGLL5	0.237327	0.95517	0.762	1	1
RNLS	0.239663	-0.623947	0	0.438	1
HSP90B1	0.239886	0.382331	0.381	0.938	1
RRBP1	0.24736	-1.18562	0.143	0.688	1
MTRFR	0.252162	0.802665	0.19	0.75	1
ZBTB48	0.252162	0.538776	0.19	0.75	1
BIRC3	0.255414	0.700924	0.095	0.438	1
CEP250-AS1	0.255414	0.360054	0.095	0.438	1
MYO3A	0.255414	1.01039	0.095	0.438	1
ENSG00000224790	0.257504	0.256612	0.048	0.5	1
ENSG00000248367	0.257504	0.326432	0.048	0.5	1
TPM3	0.259732	-0.535905	0.571	0.875	1
CORO1B	0.260018	-0.70401	0.286	0.75	1
S100A6	0.262582	-0.333004	0.762	1	1
PHACTR1	0.263141	-0.39297	0.048	0.625	1
EGR1	0.265135	0.781535	0.095	0.5	1
ENSG00000274422	0.265135	-0.274956	0	0.312	1
LINC01409	0.265135	-0.674079	0	0.312	1
XBP1	0.268184	-0.347887	0.429	0.875	1
CDK2AP2	0.269449	-0.258239	0.095	0.438	1
SNORD3B-1	0.276862	0.734189	0.333	0.875	1
HRK	0.277282	0.263133	0.048	0.562	1
PWWP2B	0.277282	0.645703	0.048	0.562	1
CST7	0.277658	-0.447942	0.048	0.625	1
ARMH1	0.277658	-0.423599	0.048	0.625	1
ENSG00000288012	0.277658	-0.495752	0.048	0.625	1
TMEM128	0.277658	-0.409452	0.048	0.625	1
ENSG00000285184	0.277658	-0.361041	0.048	0.625	1
PPP1R14B	0.277658	-0.454605	0.048	0.625	1
LINC00888	0.284979	-0.335005	0	0.562	1
MYB	0.284979	-0.313296	0	0.375	1
LINC00861	0.284979	-0.665027	0	0.562	1
BBS7	0.284979	-0.313075	0	0.562	1
ZBTB32	0.285117	0.274357	0.095	0.625	1
HERC2P2	0.292711	0.424154	0.048	0.625	1
IGKV1-8	0.292711	0.359609	0.048	0.625	1
SRGN	0.301997	-0.471356	0.619	1	1
ENSG00000274460	0.304503	0.414354	0.048	0.25	1
RIOK1	0.304683	0.415755	0.143	0.688	1
ENSG00000259113	0.308303	0.404483	0.143	0.625	1
H2AJ	0.308408	0.532587	0.381	0.625	1
RAB5IF+TGIF2	0.309588	0.619672	0.19	0.5	1
MZB1	0.312686	1.01004	0.476	0.688	1
TAGLN2	0.3143	-0.341148	0.524	0.875	1
ENSG00000224610	0.318073	-0.259046	0.714	0.938	1
CCDC88A	0.318792	0.531814	0.81	0.812	1
BCL2A1	0.320292	0.548592	0.143	0.688	1
MIS18BP1	0.325199	-0.53079	0.19	0.688	1
ENSG00000235530	0.327548	-0.349019	0	0.25	1
TP53INP1	0.336415	0.350533	0.143	0.688	1
IRF4	0.336415	0.805305	0.143	0.688	1
CCDC144B	0.336415	0.384085	0.143	0.688	1
RNGTT	0.336415	0.4952	0.143	0.688	1
DLG2	0.341314	0.563636	0.19	0.5	1
PLEKHG1	0.341314	-0.612453	0.19	0.688	1
H2AC18	0.343368	0.89258	0.476	0.75	1
TXN	0.343398	0.354569	0.476	1	1
LBH	0.357514	-0.630388	0.429	0.75	1
DMAC1	0.35793	-0.359573	0.19	0.688	1
FBXO15	0.358315	-0.306664	0.048	0.438	1
LINC01725	0.358315	0.269834	0.048	0.438	1
ENSG00000254732+TMX2	0.364197	0.268036	0.667	1	1
TNFRSF13B	0.364649	-1.04596	0.095	0.625	1
LDHA	0.364649	-0.813882	0.095	0.625	1
HNRNPAB	0.369034	0.377633	0.333	0.562	1
SP140	0.375047	0.406719	0.19	0.688	1
ANKRD36C	0.375047	0.896357	0.19	0.5	1
PSMA7	0.377563	0.400986	0.524	0.75	1
ISG15	0.381704	-0.479771	0.762	1	1
NOP10	0.382923	-0.384937	0.286	0.75	1
ALDH5A1	0.387854	-1.19547	0.143	0.438	1
RGS10	0.391041	-0.35598	0.429	0.812	1
MS4A1	0.39266	0.443464	0.19	0.5	1
ARHGAP44	0.39683	0.959019	0.619	0.938	1
COMTD1	0.396842	0.444114	0.238	0.75	1
NPM1	0.399163	0.339913	0.905	1	1
JUNB	0.411946	1.00842	0.524	0.75	1
CKLF-CMTM1	0.413145	-0.844401	0.048	0.438	1
NDUFAF2	0.419294	-0.274598	0.095	0.625	1
ARF4-AS1	0.421642	-0.400245	0	0.375	1
ENSG00000285454	0.421642	-0.280826	0	0.375	1
PYHIN1	0.424183	-0.660527	0.381	0.812	1
HS3ST1	0.426409	0.510275	0.429	0.938	1
ENSG00000288900	0.428092	0.255584	0.048	0.438	1
LINC02328	0.428831	-0.330832	0.048	0.5	1
SNHG17	0.438528	-0.521674	0.095	0.625	1
MRPL2	0.44382	0.27677	0.143	0.5	1
DDX60L	0.445509	-0.339875	0.048	0.562	1
ZNNT1	0.449887	-0.341123	0	0.312	1
ENSG00000254364	0.456333	0.357523	0.048	0.188	1
ENSG00000289073	0.456486	0.340775	0.048	0.125	1
ACTR3	0.458881	0.505523	0.333	0.625	1
IGLC2	0.463452	-0.402796	0.143	0.625	1
AKAP8L	0.463452	-0.863901	0.143	0.625	1
ENSG00000279140	0.463452	0.376839	0.143	0.5	1
CLLU1-AS1	0.465992	0.444206	0.095	0.562	1
NAPEPLD	0.465992	0.551486	0.048	0.562	1
SLC44A1	0.465992	0.295346	0.048	0.562	1
ENSG00000282199	0.470992	-0.35728	0	0.5	1
ITFG2-AS1	0.470992	-0.365938	0	0.5	1
ENSG00000266696	0.470992	-0.405571	0	0.5	1
ENSG00000289375	0.478479	0.508835	0.095	0.625	1
HAUS8	0.478479	0.52923	0.095	0.625	1
EVI2A	0.48356	0.255394	0.143	0.5	1
WFDC21P	0.486987	-0.275097	0	0.562	1
MIR3681HG	0.486987	-0.631144	0	0.438	1
ENSG00000287978	0.486987	-0.777435	0	0.438	1
ENSG00000266088	0.486987	-0.565331	0	0.438	1
C17orf49	0.486987	-0.937053	0	0.438	1
ENSG00000254319	0.486987	-0.506123	0	0.438	1
TAS2R14	0.486987	-0.256435	0	0.562	1
ASH1L-AS1	0.486987	-0.302723	0	0.438	1
ARHGEF18	0.486987	-0.703336	0	0.438	1
CEP290	0.487984	0.440033	0.19	0.688	1
PRDX6	0.489429	-0.255432	0.714	0.938	1
DDX5	0.490331	0.33617	0.952	1	1
LHPP	0.520535	-0.488769	0.381	0.5	1
ZFP36L1	0.529345	-0.800092	0.19	0.625	1
ENSG00000289518	0.538308	0.277489	0.048	0.375	1
PYCARD	0.538809	-0.386416	0.333	0.688	1
DUSP1	0.538809	-0.510766	0.333	0.75	1
SNHG29	0.569808	0.38026	0.714	1	1
SERPINB9	0.590811	-0.323171	0.143	0.5	1
ENSG00000226571	0.603	-0.294464	0.333	0.688	1
H2AC6	0.603022	-0.45616	0.333	0.688	1
CORO1A	0.608254	0.408997	0.476	0.688	1
MAP9	0.609379	0.271199	0.095	0.5	1
CENPM	0.609379	0.292799	0.095	0.5	1
TIPARP	0.609379	0.650721	0.095	0.5	1
ENSG00000277283	0.609379	0.351816	0.095	0.5	1
S100A4	0.609449	-0.253558	0.524	0.688	1
IGHM	0.609449	0.545421	0.524	0.75	1
TSPO	0.611764	0.294628	0.667	0.875	1
CNN2	0.628143	-0.790178	0.048	0.562	1
TSC22D1-AS1	0.639596	0.416145	0.048	0.312	1
LTB	0.642932	-0.792572	0.238	0.625	1
IGHG1+IGHGP	0.652033	-0.693589	0.048	0.562	1
NIBAN3	0.652033	-0.874201	0.048	0.562	1
TMEM191A	0.652033	-0.322195	0.048	0.562	1
PARP4	0.660006	0.253409	0.143	0.625	1
SPRY2	0.679326	0.88084	0.048	0.438	1
CCR7	0.689408	-0.50461	0.238	0.625	1
STAT1	0.698745	0.501864	0.524	1	1
ENSG00000272917	0.700879	0.526812	0.048	0.562	1
SMC4	0.700879	-0.372301	0.048	0.562	1
FBXO10	0.700879	0.272233	0.048	0.562	1
ZNF143	0.700879	0.349539	0.048	0.562	1
ENSG00000273619	0.700879	0.313229	0.048	0.562	1
TRIM65	0.704465	-0.353913	0	0.312	1
EVA1B	0.707859	0.439929	0.143	0.625	1
ENTPD3-AS1	0.707859	0.538741	0.143	0.625	1
PRDX2	0.713108	-0.265385	0.238	0.562	1
GBP2	0.713108	-0.271836	0.238	0.625	1
ENSG00000251002	0.715206	0.418171	0.286	0.625	1
KLHL32	0.719248	-0.28408	0	0.438	1
IFT88	0.730167	-0.517228	0	0.5	1
RAB33B-AS1	0.737087	0.473961	0.238	0.688	1
IER2	0.742098	0.293069	0.381	0.688	1
HCST	0.747022	-0.28244	0.714	1	1
ENSG00000250850	0.759271	-0.487695	0.19	0.625	1
ABCA6	0.765905	0.321643	0.381	0.688	1
EIF4A1	0.769736	0.558826	0.619	1	1
RP9	0.788769	0.601737	0.333	0.75	1
MAILR	0.788769	0.54435	0.333	0.75	1
ENSG00000256966	0.802184	0.391493	0.048	0.5	1
NFYC-AS1	0.802184	0.323611	0.048	0.5	1
GRN	0.804724	-0.674402	0.095	0.562	1
PCED1B	0.804724	-0.948179	0.095	0.5	1
POU2F2	0.810489	-0.388283	0.238	0.625	1
TIMM10	0.810489	0.751703	0.238	0.625	1
ENSG00000261386	0.828115	-0.387533	0.048	0.5	1
PLPP5	0.828115	-0.49235	0.048	0.5	1
ENSG00000273759	0.841154	0.457561	0.095	0.5	1
POU2F2-AS1	0.854236	-0.472792	0.048	0.5	1
IGFBP4	0.856126	-0.316405	0.095	0.562	1
LIME1	0.857765	-0.857505	0.143	0.562	1
ZNF236	0.857765	0.56006	0.143	0.562	1
PCNA	0.857765	0.352842	0.143	0.562	1
PLP2	0.863794	-0.687464	0.429	0.625	1
DPEP2	0.882072	-0.297109	0.095	0.562	1
SERPINB8	0.88342	0.403974	0.143	0.562	1
ENSG00000286379	0.90496	-0.312497	0.048	0.188	1
ANKRD36	0.910111	0.65367	0.19	0.625	1
HSPA5	0.910899	0.422384	0.238	0.625	1
PSME2	0.91394	0.262397	0.571	0.875	1
TUBA1B	0.914125	0.460179	0.619	1	1
BTG2	0.914374	0.280465	0.714	0.875	1
COX5A	0.91445	-0.29272	0.762	0.938	1
ZNF347	0.929948	0.705636	0.095	0.438	1
ENSG00000288586	0.932026	0.287762	0.048	0.125	1
HLX-AS1	0.934318	0.472732	0.095	0.562	1
MCM8	0.934318	0.452727	0.095	0.562	1
ENSG00000283959	0.934318	0.263738	0.095	0.562	1
HOOK1	0.934318	0.254302	0.095	0.562	1
ENSG00000288827	0.937194	1.49374	0.333	0.75	1
LDHB	0.938602	0.300359	0.619	1	1
DNAJA4	0.949091	0.286403	0.048	0.25	1
SMIM24	0.953113	0.368495	0.048	0.312	1
CD99	0.962684	-1.07431	0.429	0.625	1
ENSG00000279602	0.963058	0.802858	0.571	1	1
IFI44L	0.963058	0.522837	0.571	1	1
LDLRAD4	0.987343	0.952124	0.286	0.688	1
PMAIP1	0.987729	0.398239	0.667	1	1
COL19A1	1	0.344871	0.238	0.625	1
EBPL	1	-0.420314	0	0.5	1
ARL10+HIGD2A	1	-0.325421	0.571	0.75	1
PARK7P1	1	-0.346086	0	0.375	1
KHDC1-AS1	1	-0.291331	0	0.5	1

## Sheet: Patient 1 - Subclone 5
Supplemental Table S3. Full differential gene expression results when comparing subclone 5 in the pre-treatment and relapse sample of patient 1.
gene	p_val	avg_log2FC	pct.1	pct.2	p_val_adj
LINC01569	1.14499e-15	-0.723838	0.017	1	2.28999e-12
CD2AP-DT	4.85879e-14	-0.254571	0.034	1	9.71758e-11
ID1	1.33102e-12	0.380913	0.051	1	2.66204e-09
CA5B	1.00481e-11	-0.841062	0.051	0.933	2.00962e-08
BIRC3	6.06992e-11	0.443794	0.102	0.067	1.21398e-07
KNL1	6.63856e-11	-0.489982	0.017	0.867	1.32771e-07
ENSG00000258857+ENSG00000259113	7.32371e-11	-0.558551	0.034	0.933	1.46474e-07
DERL3	7.54223e-11	-0.420851	0.017	0.867	1.50845e-07
ENSG00000270022	2.78122e-10	0.341595	0.085	1	5.56244e-07
ABHD18	5.53508e-10	-0.338137	0	0.867	1.10702e-06
TTC21B	5.53508e-10	-0.399813	0	0.133	1.10702e-06
ENSG00000258857	1.52344e-09	-0.502161	0.085	0.933	3.04688e-06
ENSG00000285827	5.69017e-09	-0.272761	0.017	0.867	1.13803e-05
ENSG00000250461	6.09248e-09	0.376449	0.068	0.133	1.2185e-05
ENSG00000289082	6.85601e-09	-0.280776	0	0.8	1.3712e-05
FBXO15	1.4527e-08	-0.437837	0.017	0.133	2.90541e-05
IGHG1+IGHGP	1.87981e-08	-0.821658	0.085	0.933	3.75962e-05
LILRB4	3.00711e-08	-0.531077	0.136	1	6.01422e-05
FCRL2	4.01195e-08	1.08964	0.169	0.133	8.02391e-05
SERPINB9	4.63276e-08	0.500493	0.153	0.133	9.26553e-05
RFX5-AS1	6.02132e-08	-0.288882	0.017	0.8	0.000120426
CD68	6.54891e-08	-0.371461	0.068	0.867	0.000130978
ENSG00000257261+ENSG00000272369	7.5997e-08	0.398692	0.085	0.133	0.000151994
UHRF1BP1	7.7784e-08	-0.300444	0	0.733	0.000155568
PTTG1	1.39436e-07	-0.800069	0.136	0.933	0.000278872
ENSG00000287190	1.46209e-07	0.433183	0.119	0.933	0.000292418
RGS1	1.46209e-07	0.303479	0.119	0.933	0.000292418
HLA-DPB2	3.99056e-07	-0.327745	0.034	0.8	0.000798111
ENSG00000256664	3.99056e-07	-0.346554	0.034	0.8	0.000798111
KMO	4.32239e-07	0.462888	0.068	0.133	0.000864478
ENSG00000203279	4.85227e-07	0.448419	0.034	0.8	0.000970454
SP100+SP140L	6.91829e-07	0.335082	0.153	1	0.00138366
RILP	8.0653e-07	-0.301795	0	0.667	0.00161306
LYST	1.47528e-06	0.707007	0.085	0.2	0.00295055
C2orf76	2.03277e-06	-0.698752	0.119	0.867	0.00406555
CFAP20	2.11737e-06	0.445741	0.119	0.933	0.00423475
FCRL1	2.2097e-06	0.287673	0.102	0.2	0.00441941
PIK3CD-AS2	2.79148e-06	0.250468	0.102	0.867	0.00558296
ADTRP	3.40584e-06	1.1642	0.254	0.2	0.00681167
CIPC	3.59424e-06	-0.492	0	0.2	0.00718848
SLC25A53	3.78261e-06	0.401125	0.153	0.933	0.00756522
MACORIS	7.66531e-06	-0.418089	0.068	0.8	0.0153306
CTNNA1-AS1	1.06928e-05	-0.517898	0	0.467	0.0213856
ENSG00000234141+GLCCI1-DT	1.64939e-05	-0.282808	0.017	0.733	0.0329877
RRBP1	2.03163e-05	-0.328808	0.169	0.933	0.0406326
ENSG00000289340	2.63359e-05	-0.327716	0.085	0.8	0.0526718
BCYRN1	2.96522e-05	-0.434919	0	0.667	0.0593044
NPTX1	3.24957e-05	0.6465	0.153	0.933	0.0649914
NUCB2	4.41381e-05	0.564316	0.136	0.867	0.0882761
ENSG00000275091	4.41381e-05	0.36089	0.136	0.867	0.0882761
TBC1D22A-DT	4.41381e-05	0.626218	0.136	0.867	0.0882761
FOSB	4.41381e-05	0.412177	0.136	0.867	0.0882761
MRPL44	4.42858e-05	-0.474533	0.186	0.933	0.0885717
GADD45B	4.91315e-05	-0.336071	0.119	0.867	0.0982631
IQCH-AS1	5.72704e-05	-0.513624	0.034	0.733	0.114541
RBBP9	6.19881e-05	-0.631699	0.034	0.733	0.123976
H1-5	8.01451e-05	-0.36886	0	0.267	0.16029
ENSG00000267120	8.01451e-05	-1.03013	0	0.267	0.16029
LGR6	8.44457e-05	0.348588	0.017	0.467	0.168891
SMIM14	8.91204e-05	0.686642	0.254	0.267	0.178241
ITM2C	9.84827e-05	0.412034	0.169	0.933	0.196965
LIME1	9.86764e-05	0.285529	0.051	0.267	0.197353
ENSG00000266088	9.86764e-05	0.395848	0.051	0.267	0.197353
AFF4-DT	9.91342e-05	-0.306081	0	0.4	0.198268
WARS1	0.000101154	-0.289564	0.068	0.8	0.202307
CRYBA4+ENSG00000286326	0.000105883	0.326408	0.119	0.867	0.211765
SERPINB8	0.000105883	0.394615	0.119	0.867	0.211765
ENSG00000285646	0.000105883	0.635205	0.119	0.867	0.211765
CD72	0.000113358	0.348269	0.119	0.267	0.226717
PPP1R14B	0.000117778	0.680259	0.203	0.267	0.235556
VPREB3	0.000118877	0.748423	0.237	0.267	0.237755
DRAIC	0.000140117	0.605373	0.203	0.933	0.280233
MS4A4E	0.000188185	-1.64224	0.017	0.733	0.376371
LGALS3	0.000197484	-0.400053	0.051	0.733	0.394968
TDRKH	0.000217547	-0.256708	0	0.6	0.435095
ARIH2OS	0.000305116	-0.373479	0.085	0.8	0.610233
H4C2	0.000310155	0.339421	0.017	0.533	0.62031
SFTPB	0.000386808	0.465466	0.169	0.867	0.773617
RGS2	0.000395604	1.21784	0.237	1	0.791208
MYH9	0.000423336	-0.824458	0.254	0.933	0.846672
C19orf73	0.000423574	0.305991	0.085	0.8	0.847149
MYL9	0.000443986	-0.544266	0.237	0.933	0.887971
PLEK	0.000512615	0.382786	0.068	0.267	1
S100A10	0.000534981	-0.875031	0	0.2	1
ING2	0.000568563	-0.299929	0.017	0.267	1
TNFRSF17	0.000655338	-0.417721	0.034	0.267	1
RGP1	0.000712382	0.291045	0.068	0.733	1
PHPT1	0.000725013	0.366086	0.102	0.733	1
DSTN	0.000802796	-0.60323	0.22	0.867	1
ENSG00000289210	0.000845277	-0.286203	0	0.333	1
CLEC4G	0.000864774	-0.475321	0.068	0.267	1
TIGIT	0.000876594	-0.40999	0.085	0.267	1
IFI44	0.00102699	0.503925	0.254	1	1
DDIT4	0.00113652	0.303778	0.271	1	1
AHNAK	0.00129691	-0.310135	0.186	0.867	1
RXYLT1	0.00132195	-0.355986	0.119	0.8	1
PALLD	0.00132195	-0.404893	0.119	0.8	1
MAP3K8	0.00138724	-0.268675	0.017	0.667	1
ANXA6	0.0014469	0.481389	0.186	0.333	1
NUBPL	0.0015709	-0.268803	0.119	0.8	1
LDLRAD4	0.00175875	0.533321	0.169	0.867	1
ENSG00000273391	0.00176011	-0.497987	0.119	0.8	1
ENSG00000266696	0.001925	0.379013	0.068	0.6	1
PLXNB1	0.0019361	-0.343098	0.017	0.467	1
C1orf112	0.00200121	0.266723	0.051	0.733	1
SMC4	0.00203579	0.399974	0.22	0.333	1
CCL4	0.00212494	1.16955	0.085	0.267	1
MAML2	0.00221685	0.259937	0.034	0.6	1
MDM2	0.0022183	0.532891	0.271	1	1
C1QBP	0.00225001	-0.622724	0.322	0.933	1
CD70	0.00289984	-0.891257	0.034	0.667	1
GEMIN6	0.00289984	-0.593974	0.034	0.667	1
RGCC	0.0030937	0.475482	0.102	0.333	1
LINC01962	0.00337923	-0.429529	0	0.4	1
LAG3	0.00338185	-0.540122	0.22	0.867	1
ENSG00000218313	0.00359027	-0.904642	0.017	0.533	1
EVI2A	0.00359485	-0.564988	0.119	0.333	1
TPM2	0.0037276	0.456911	0.288	1	1
ENSG00000204584	0.00383856	-0.448229	0.017	0.533	1
SLC25A30	0.00383856	-0.381977	0.017	0.533	1
ENSG00000289588	0.00419728	0.363065	0.102	0.733	1
ZMYND8	0.00427875	-0.374434	0.102	0.333	1
ENSG00000259976	0.00429313	0.782832	0.237	0.933	1
MYBL2	0.00430963	-0.27013	0.068	0.333	1
PYHIN1	0.00450418	-0.629447	0.237	0.867	1
IRF4	0.00455326	0.32011	0.068	0.733	1
ARHGAP44	0.00459482	-1.17362	0.356	0.867	1
RNGTT	0.00466298	-0.354586	0.153	0.8	1
MRC1	0.00468175	-0.627512	0.034	0.333	1
ABAT	0.00488709	-0.414216	0	0.667	1
PSMG2	0.00488709	-0.592054	0	0.333	1
ARHGEF18	0.00488709	-0.379075	0	0.333	1
ENSG00000280850	0.00511071	-0.405527	0	0.133	1
ENSG00000283202	0.00511071	-0.367989	0	0.133	1
ENSG00000285080	0.00514454	0.25129	0.034	0.267	1
SEC11C	0.00531618	-0.662025	0.39	0.933	1
ZNF827	0.00532961	-0.635821	0.051	0.333	1
NOL8	0.00534346	-0.318857	0.085	0.333	1
TRPM4	0.00541333	1.08105	0.288	1	1
TP53INP1	0.00559684	0.577345	0.136	0.8	1
KLHL9	0.00613433	0.4238	0.169	0.8	1
HLA-DPA1	0.0061452	-0.467751	0.322	0.933	1
PLEKHG1	0.0062213	0.564314	0.339	0.4	1
ENSG00000272911	0.00654254	-0.283397	0	0.267	1
LIMS1	0.00752837	-0.501654	0.237	0.867	1
GPR132	0.00784563	-0.293266	0	0.467	1
H2AJ	0.00794443	0.844234	0.525	0.467	1
SDF2L1	0.00836048	-0.368946	0.136	0.733	1
COMTD1	0.00840333	0.351134	0.153	0.8	1
IER2	0.0084766	0.64487	0.254	0.4	1
ENSG00000273289+PRR34-AS1	0.00878826	0.298214	0.119	0.333	1
COL19A1	0.00969915	-0.673552	0.102	0.733	1
ABCA9	0.0101854	-0.654358	0.102	0.733	1
EBPL	0.0111064	0.451241	0.085	0.333	1
ENSG00000279670	0.0111064	0.354649	0.085	0.333	1
MIR222HG	0.011777	-0.305143	0.102	0.733	1
PVT1	0.0118152	-0.251478	0.339	0.933	1
MEF2C-AS1	0.01246	0.356184	0.22	0.867	1
LNCDAT	0.0128124	-0.343732	0.034	0.267	1
STAT1	0.0132833	-1.05851	0.424	1	1
PLEKHA1	0.0138298	-0.283088	0	0.533	1
ENSG00000257524	0.0144859	0.312899	0.051	0.333	1
DLG2	0.0144859	0.379064	0.051	0.333	1
NFKBIA	0.0151209	0.615107	0.271	0.933	1
MRPL2	0.0161164	0.54804	0.22	0.4	1
ODC1	0.0163378	0.764276	0.39	0.467	1
ENSG00000289317	0.016425	0.303205	0.034	0.333	1
NBPF19	0.018585	-0.749059	0.034	0.667	1
GLCE	0.018585	-0.385037	0.034	0.667	1
RP9	0.0187714	-0.9477	0.288	0.8	1
COTL1	0.0191342	-0.694001	0.39	0.867	1
ITGB2	0.019789	-0.421	0	0.333	1
ENSG00000255081	0.019789	-0.342366	0	0.133	1
GIHCG	0.0204896	0.257371	0.034	0.667	1
LINC00888	0.0207852	-0.329889	0	0.6	1
MAGIX+PLP2	0.0211104	0.522472	0.254	0.867	1
UQCRH	0.0247004	-0.748222	0.898	0.933	1
NUDT1	0.0249414	-0.860798	0.39	0.867	1
KDSR-DT	0.0271263	-0.301902	0.017	0.533	1
AKAP12	0.0278732	0.362144	0.305	0.933	1
TXNDC5	0.0293616	0.291748	0.254	0.867	1
ENSG00000262202	0.0301161	0.992563	0.237	0.867	1
IGLC7	0.0305976	1.0965	0.729	0.733	1
PTER	0.030676	-0.456595	0.051	0.667	1
ARMH1	0.0309315	-0.381384	0.102	0.667	1
ENO1	0.0311672	-0.35418	0.458	0.933	1
TUBB	0.0320291	-0.345511	0.22	0.8	1
IGHV5-78	0.0320819	-0.399006	0.051	0.667	1
ZNF236	0.0344497	-0.344839	0.136	0.733	1
GMDS	0.0359813	0.587974	0.186	0.8	1
STAG3	0.0360692	0.561144	0.102	0.4	1
ENSG00000260081	0.0369012	-0.40171	0.017	0.6	1
STMN1	0.0374036	-0.37762	0.475	1	1
RHOB	0.0379021	-0.291981	0.407	0.933	1
TRDC	0.0385842	-1.18219	0.475	0.867	1
ACOT13	0.0425063	0.252212	0.102	0.4	1
ENSG00000279088	0.0430409	-0.486071	0.424	0.933	1
ACSM1	0.0447301	-0.285014	0	0.2	1
ITGB1	0.0454385	-0.884192	0.237	0.733	1
BIK	0.0476354	0.719447	0.169	0.4	1
APOD	0.0498304	0.351942	0.068	0.4	1
ENSG00000272917	0.0498304	0.358116	0.068	0.4	1
MED31	0.050984	0.358975	0.102	0.667	1
MTRFR	0.0524399	0.899479	0.237	0.467	1
GAS5	0.0527814	-0.422707	0.898	1	1
ALDH5A1	0.0530591	-0.340247	0.136	0.4	1
ZC3H6	0.0530591	0.312639	0.136	0.733	1
PGLS	0.0559684	-0.369721	0.61	0.933	1
SNORD3A	0.0597072	0.627253	0.373	1	1
SELL	0.0598596	-0.846886	0.22	0.733	1
CAMKK2	0.0631904	-0.275888	0.034	0.6	1
ITM2A	0.0639446	-0.573724	0.525	0.933	1
GTF2H5	0.064132	0.294387	0.169	0.4	1
FOLR2	0.0658891	0.383746	0.034	0.6	1
LINC00467	0.0659857	0.486094	0.136	0.4	1
ENSG00000289213	0.0660676	-0.654585	0.034	0.333	1
FAM126A	0.0662968	0.710512	0.356	1	1
CORO1B+PTPRCAP	0.0668718	-0.456372	0.797	0.933	1
ENSG00000285417	0.0671439	-0.636157	0.678	1	1
ENSG00000257341	0.069377	1.06469	0.898	0.933	1
CORO1B	0.0711499	0.535514	0.356	0.933	1
SNHG29	0.0736531	-0.462633	0.898	1	1
THAP12P7	0.0744279	-0.383862	0	0.333	1
CCL3	0.0745022	0.301798	0.034	0.133	1
LINC00158	0.0794521	-0.28591	0.085	0.667	1
ZNF500	0.0798375	-0.665939	0.034	0.4	1
ENSG00000272256	0.081885	0.252532	0.254	0.8	1
GAPDH	0.0826992	-0.587724	0.881	1	1
HLA-H	0.0831538	0.396423	0.051	0.2	1
ENSG00000268355+LINC01480	0.083317	0.830124	0.339	0.933	1
TRAC	0.0868879	-0.396558	0.424	0.867	1
BTG1-DT	0.089965	-0.593743	0.288	0.8	1
EAF2	0.0919915	-0.486548	0.322	0.8	1
SHISAL2A	0.092027	-0.25789	0	0.6	1
WFDC21P	0.0937345	-0.274034	0.017	0.467	1
HCST	0.0945617	-0.538539	0.78	0.933	1
CDH24	0.0965806	-0.532994	0	0.133	1
IGHG4	0.0992065	-0.896247	0.627	0.933	1
CD79A	0.0997718	0.548135	0.763	0.733	1
LGALS1	0.105529	-0.572265	0.644	0.933	1
MEF2C	0.105648	-0.671804	0.576	0.867	1
DUSP1	0.106238	0.966816	0.339	0.533	1
NPM1	0.106607	-0.273967	0.932	1	1
AKAP8L	0.107431	-0.55617	0.373	0.8	1
ENSG00000223711	0.115039	-0.443143	0.017	0.2	1
ENSG00000224790	0.115479	-0.330931	0.017	0.533	1
TYROBP	0.12234	-0.532213	0.068	0.6	1
SLC27A5	0.123796	0.420769	0.136	0.667	1
TTN	0.124735	-0.49766	0.441	0.867	1
FCMR	0.124857	-0.430629	0.831	0.933	1
CD99	0.125459	-0.503276	0.593	1	1
HRK	0.12584	-0.518462	0.119	0.667	1
SNHG5	0.12861	-0.347819	0.915	0.933	1
GPATCH4	0.129463	0.364533	0.169	0.467	1
TSPO	0.129678	-0.380118	0.627	0.867	1
DPEP2	0.136889	0.561081	0.153	0.467	1
PCGF5	0.142792	-0.362733	0.525	0.933	1
FKBP7	0.144499	-0.450542	0	0.333	1
APOBEC3G	0.14608	-0.467478	0.576	0.933	1
ENSG00000289341	0.146574	0.582205	0.373	0.933	1
ATOX1	0.149922	0.676666	0.576	0.733	1
PRDX2	0.151137	-0.497794	0.237	0.733	1
SNORD3B-2	0.152277	0.922538	0.356	0.933	1
ARHGAP10	0.152463	-0.400552	0.119	0.667	1
CEP290	0.162231	-0.305021	0.119	0.667	1
BAX	0.165558	-0.522589	0.831	1	1
CD44	0.165605	-0.397146	0.39	0.8	1
DYNLL1	0.170882	-0.274892	0.78	0.933	1
HSP90B1	0.173715	0.262658	0.458	1	1
GRAMD4	0.185615	-0.302801	0	0.4	1
ARPC1B	0.186113	-0.384786	0.763	1	1
LINC01857	0.188221	-0.261272	0.424	0.867	1
PHACTR1	0.194363	0.488912	0.119	0.467	1
H2AC14	0.220242	0.371934	0.085	0.6	1
ENSG00000288740	0.220242	0.419133	0.085	0.6	1
SPACA9	0.220242	0.300952	0.085	0.6	1
EMC1-AS1	0.220242	0.371816	0.085	0.6	1
MARCKSL1	0.220581	0.479104	0.322	0.533	1
PSME2	0.227466	0.69958	0.678	0.867	1
DDX5	0.231431	-0.814978	1	1	1
ENSG00000251002	0.237889	-0.342412	0.153	0.667	1
URB1-AS1	0.249727	-0.459294	0	0.533	1
TYMP	0.250499	0.263531	0.186	0.467	1
HMGB2	0.250681	0.321184	0.729	0.933	1
EIF3A	0.251761	-0.346744	0.424	0.8	1
CCDC122	0.25298	-0.299695	0.051	0.6	1
C12orf60	0.253835	-0.417709	0	0.133	1
ENSG00000266918	0.253835	-0.941009	0	0.133	1
VDAC3	0.260693	0.730386	0.271	0.8	1
SPIB	0.264902	0.430623	0.39	0.6	1
PCED1B	0.269408	0.383956	0.254	0.533	1
IGFLR1	0.274752	-0.787618	0.525	1	1
MAP1LC3A	0.275909	0.27209	0.051	0.6	1
H2AC18	0.277349	-0.439454	0.39	0.733	1
MAILR	0.280247	-0.428607	0.271	0.733	1
ENSG00000279602	0.281023	1.21056	0.373	0.933	1
ZNF487	0.287188	0.575311	0.22	0.533	1
DMKN	0.287947	-0.272548	0.305	0.733	1
IRAG2	0.291033	0.313437	0.576	0.667	1
LBH	0.297341	-0.304145	0.576	0.867	1
CENPM	0.298206	0.426401	0.102	0.6	1
PITPNA-AS1	0.309439	0.269635	0.153	0.467	1
ENSG00000279140	0.309756	-0.537715	0.068	0.6	1
CALM3	0.314336	0.305411	0.373	0.6	1
NBPF20	0.335592	-0.646133	0.085	0.6	1
YWHAH	0.354161	1.30063	0.627	1	1
PTPN6	0.359513	-0.447947	0.237	0.667	1
TESC	0.360311	0.899054	0.39	0.667	1
BCL2A1	0.361328	0.363522	0.119	0.6	1
GINM1	0.362476	0.282439	0.068	0.6	1
FAM133DP	0.362476	0.373541	0.068	0.6	1
LINC01545	0.370186	-0.362395	0	0.133	1
CKB	0.370186	-0.417059	0	0.133	1
DNASE1L2	0.370186	-0.310694	0	0.2	1
LDHA	0.372061	0.283071	0.254	0.733	1
IGHA1	0.372764	0.742238	0.576	0.8	1
CHD4	0.374698	0.426889	0.339	0.6	1
SMC2	0.37938	0.33132	0.119	0.467	1
ATAD5	0.379385	0.707148	0.119	0.467	1
ENSG00000285884	0.379385	0.481868	0.119	0.467	1
ENSG00000288989	0.384609	0.257793	0.034	0.4	1
ARL10+HIGD2A	0.387093	0.396744	0.729	0.867	1
TUBA1A	0.39066	0.516235	0.627	0.933	1
H2BC5	0.391248	-0.466642	0.051	0.467	1
H2AC19	0.393584	0.261374	0.356	0.8	1
NEAT1	0.398075	-0.420257	0.441	0.733	1
ZNF143	0.411286	-0.396559	0.051	0.467	1
MIS18BP1	0.415229	-0.765939	0.39	0.667	1
FAM3C	0.424065	0.539821	0.458	0.667	1
RALGPS2	0.425904	0.368024	0.475	0.733	1
ANXA2	0.428159	-0.308925	0.424	0.8	1
CTNND1	0.442518	-0.593344	0	0.267	1
ANKRD36	0.445119	-1.22803	0.237	0.667	1
JUNB	0.448366	0.270371	0.542	0.667	1
ENSG00000279555	0.454405	-0.721668	0.034	0.467	1
CFLAR	0.45491	0.864454	0.322	0.8	1
ZBTB48	0.457001	-0.392191	0.102	0.6	1
MHENCR	0.457001	-0.5675	0.102	0.6	1
KPNA2	0.459677	0.319395	0.085	0.6	1
RAB33B-AS1	0.462844	0.423564	0.169	0.533	1
PAX8	0.463401	-0.298978	0.017	0.333	1
HLA-DQB1	0.475535	-0.345119	0.831	1	1
PHF19	0.489889	0.298257	0.136	0.6	1
RHBDL1	0.4922	-0.303927	0	0.267	1
ASMT	0.4922	-0.369894	0	0.333	1
PYCARD	0.494928	-0.313626	0.407	0.8	1
LHPP	0.497197	0.283779	0.305	0.6	1
VAMP5+VAMP8	0.503525	0.602651	0.61	0.867	1
TUBB4B	0.503959	0.964166	0.407	0.933	1
ENSG00000254732+TMX2	0.505774	0.735441	0.661	1	1
IFITM1	0.509994	-0.36703	0.983	1	1
PFN1	0.518156	0.279244	0.831	0.933	1
LINC01480	0.522279	-0.432699	0.407	0.733	1
ENSG00000242615	0.528642	-0.428364	0	0.4	1
LY6E	0.530801	0.398622	0.627	1	1
IGLL5	0.536207	-0.334577	0.932	1	1
ACTB	0.53621	-0.39298	0.932	1	1
MAD1L1	0.53815	-0.333446	0.119	0.6	1
EVA1B	0.577267	0.613128	0.136	0.533	1
P3H4	0.58316	-0.69529	0.017	0.267	1
ENSG00000259316	0.58316	-0.443106	0.017	0.267	1
ZFP36L1	0.592635	-0.259329	0.356	0.6	1
TARS3	0.592993	-0.302148	0.237	0.667	1
TUBA1B	0.596368	0.51544	0.661	0.933	1
NDUFAF2	0.597342	0.611489	0.203	0.533	1
DBI	0.599857	0.258952	0.881	1	1
FCER2	0.608423	0.375634	0.78	1	1
IFI44L	0.61757	0.27563	0.508	1	1
PSMA7	0.618091	0.304816	0.797	0.867	1
RGS10	0.633431	0.269857	0.627	0.8	1
HLA-DOB	0.647393	0.342364	0.39	0.8	1
ATP2B1	0.647476	-0.610546	0.186	0.533	1
PLP2	0.655818	-0.542672	0.441	0.667	1
SF1-DT	0.677443	0.523083	0.119	0.6	1
HSPE1	0.684223	-0.294994	0.458	0.8	1
CDKN1A	0.688114	0.276172	0.051	0.467	1
CD69	0.702444	0.609105	0.424	0.733	1
CD27	0.710512	0.43584	0.559	1	1
CCDC167	0.71414	0.289389	0.322	0.733	1
MIER2	0.717582	0.265652	0.034	0.2	1
GBP2	0.725404	0.280733	0.237	0.667	1
CALR	0.740036	0.714805	0.525	1	1
SRGN	0.746261	0.266404	0.78	1	1
ENSG00000276216	0.75667	0.604411	0.441	0.867	1
HS3ST1	0.758607	1.23799	0.475	1	1
SLC5A3	0.760915	0.330269	0.102	0.533	1
MIR155HG	0.764356	-0.315309	0.627	0.8	1
ENSG00000289065	0.779322	0.406845	0.085	0.533	1
H2BC4	0.781284	0.323865	0.22	0.6	1
ENSG00000265206	0.785372	-0.505189	0.254	0.6	1
KLF6	0.786493	0.300944	0.695	1	1
H2AC6	0.791983	-0.396071	0.322	0.667	1
CLEC2D	0.793093	0.285593	0.136	0.6	1
GSTP1	0.796927	0.314329	0.695	0.867	1
MAP9	0.798379	-0.310465	0.034	0.533	1
PIGR	0.814595	0.423138	0.271	0.6	1
ENSG00000287092	0.815101	-0.415257	0.203	0.6	1
EIF4A1	0.816818	0.261864	0.627	0.933	1
C1orf162	0.827228	0.442153	0.203	0.6	1
ENSG00000259113	0.835633	0.973562	0.186	0.6	1
SNHG17	0.837585	-0.827698	0.186	0.6	1
H1-10	0.839734	-0.257224	0.78	1	1
HERPUD1	0.842977	1.06542	0.424	0.867	1
EIF5B	0.86452	0.301624	0.407	0.733	1
ENSG00000273338	0.868619	0.359711	0.542	0.867	1
EMP3	0.868973	0.845982	0.559	0.933	1
MYO1G	0.872287	-0.273998	0.051	0.533	1
LINC02397	0.874709	-0.252878	0.186	0.6	1
IFI6	0.87948	-0.280047	0.542	1	1
ID3	0.881252	0.254459	0.661	1	1
SPN	0.890589	-0.983035	0.085	0.533	1
CLLU1-AS1	0.897388	0.294156	0.102	0.533	1
MAP7D3	0.897388	0.296152	0.102	0.533	1
ENSG00000226571	0.898175	-0.350497	0.407	0.667	1
CTBP1-DT	0.903188	-0.553132	0.017	0.4	1
ENSG00000274213	0.908546	-0.328223	0.017	0.467	1
FCRL5	0.921645	-0.661222	0.136	0.533	1
RNF144B	0.928837	0.261433	0.051	0.533	1
CHD1L	0.928837	0.349239	0.051	0.533	1
MAN1A1	0.940718	-0.470143	0.288	0.6	1
ENSG00000283103	0.945165	-0.382112	0.085	0.533	1
HSP90AB1	0.956992	0.297074	0.78	0.933	1
THUMPD2	0.9581	-0.286862	0.068	0.533	1
ELF4	0.967659	0.417519	0.068	0.333	1
CKLF-CMTM1	1	-0.505743	0.153	0.533	1
GUSBP5	1	-0.415595	0	0.133	1
CCNB1	1	-0.26964	0	0.333	1
MEIG1	1	-0.294995	0	0.467	1
BRCA1	1	-0.255906	0	0.333	1
POLR1G	1	-0.282878	0	0.333	1
